# Supplementary material
Source: PubMed Central journal article supplement (PMC2933359)

**Cu(I)-Catalyzed Regioselective Diamination of Conjugated Dienes via Dual  
Mechanistic Pathways**

**Baoguo Zhao, Xingao Peng, Sunliang Cui, and Yian Shi\***

*Department of Chemistry  
Colorado State University  
Fort Collins, CO 80523*

**Supporting Information**

Reference 14a: Ribas, X.; Jackson, D. A.; Donnadiou, B.; Mahía, J.; Parella, T.; Xifra, R.; Hedman, B.; Hodgson, K. O.; Llobet, A.; Stack, T. D. P. *Angew. Chem., Int. Ed.* **2002**, *41*, 2991.

Reference 14b: Xifra, R.; Ribas, X.; Llobet, A.; Poater, A.; Duran, M.; Solà, M.; Stack, T. D. P.; Benet-Buchholz, J.; Donnadiou, B.; Mahía, J.; Parella, T. *Chem. Eur. J.* **2005**, *11*, 5146.

**General Methods.** All commercially available reagents were used without further purification. Benzene-*d*<sub>6</sub> was freshly distilled from sodium-benzophenone under argon atmosphere. Column chromatography was performed on silica gel (200-400 mesh). <sup>1</sup>H NMR spectra were recorded on a 300 MHz or 400 MHz NMR spectrometer and <sup>13</sup>C NMR spectra were recorded on a 75 MHz or 100 MHz NMR spectrometer. IR spectra were recorded on a FT-IR spectrometer.

**Terminal diamination of 1b (Table 1, entry 7).** To a 1.5 mL vial equipped with a stir bar were added CuCl (0.002 g, 0.020 mmol) and tri(cyclohexyl)phosphine (0.0084 g, 0.030 mmol). The sealed vial was evacuated and filled with Ar three times, followed by the addition of C<sub>6</sub>D<sub>6</sub> (0.2 mL). Upon stirring at rt for 1 h, a solution of 3-methyl-1-phenylbutadiene (**1b**) (0.029 g, 0.20 mmol) in C<sub>6</sub>D<sub>6</sub> (0.05 mL) was added via syringe, followed by the addition of di-*tert*-butyldiaziridinone (0.068 g, 0.40 mmol). The reaction mixture was stirred at rt for 10 h and purified by chromatography on silica gel (hexanes/ethyl acetate, 10:1) to give terminal diamination product **3b** as a colorless oil (0.062 g, 99%).

**Representative internal diamination (Table 2, entry 1).** To a 1.5 mL vial equipped with a stir bar was added CuBr (0.0015 g, 0.010 mmol). The sealed vial was evacuated and filled with Ar three times, followed by the addition of CDCl<sub>3</sub> (0.4 mL) and (*E*)-deca-1,3-diene (**1c**) (0.023 g, 0.19 mmol). After the mixture was cooled to 0 °C in an ice bath, di-*tert*-butyldiaziridinone (**2**) (0.0374 g, 0.22 mmol) was added. The reaction mixture was stirred at 0 °C for 20 h and purified by chromatography on silica gel (hexanes/ethyl acetate, 10:1) to give diamination product **4c** as a colorless oil (0.053 g, 97%, **4c:3c** = 96:4).

**Large scale diamination and subsequent deprotection (Scheme 2).** To a 500 mL round-bottomed flask equipped with a stir bar was added CuBr (0.994 g, 6.95 mmol). The sealed flask was evacuated and filled with Ar three times, followed by the addition of CHCl<sub>3</sub> (280 mL) and (*E*)-deca-1,3-diene (**1c**) (17.0 g, 137.1 mmol). After the mixture was cooled down to -10 °C, di-*tert*-butyldiaziridinone (**2**) (26.0 g, 153.0 mmol) was added. The reaction mixture was stirred at -10 °C for 30 h, concentrated, and purified by chromatography on silica gel (hexanes/ethyl acetate, 10:1) to give diamination product **4c** as colorless oil (38.2 g, 95%, **4c:3c** = 95:5).

Diamination product **4c** (38.2 g, 130.0 mmol) was refluxed in conc. HCl (700 mL) for 30 h. Upon removal of one third of the volume by rotary evaporation, the reaction mixture was cooled to room temperature, then washed with ether (200 mL) and hexanes (100 mL). After the aqueous solution was concentrated by rotary evaporation, an aqueous NaOH solution (4 M, 100 mL) was added. The resulting mixture was stirred at rt for 0.5 h, extracted with CH<sub>2</sub>Cl<sub>2</sub> (150 mL × 4), dried over (Na<sub>2</sub>SO<sub>4</sub>), filtered, and concentrated to give free diamine **5** as a pale yellow oil (20.3 g, 100%).

**Resolution of racemic diamine (±)-5 (Scheme 2).** To a stirred solution of racemic diamine (±)-**5** (19.5 g, 125.0 mmol) in methanol (50 mL) immersed in a 60 °C oil bath was added a hot homogenous solution of L-(+)-tartaric acid (14.1 g, 94.0 mmol) in methanol (50 mL) over 10 min, followed by the addition of glacial acetic acid (3.75 g, 62.5 mmol). At this point, a large amount of solid precipitated. The suspension was cooled to rt with vigorous stirring over 1 h, heated to reflux for 3 min using a heat gun, and cooled again to rt without stirring. After 2 h at rt, the mixture was filtered to give a white solid. The solid was washed with cold methanol (100 mL), dried under reduced pressure, and dissolved in hot water (25 mL). To the hot homogenous solution was added hot methanol (50 mL). A white solid precipitated immediately. The mixture stayed at rt for 12 h. The solid was collected by filtration, washed with cold

methanol (100 mL), and dried under reduced pressure to give the L-(+)-tartaric acid salt (14.8 g). The salt was treated with NaOH solution (4 M, 50 mL, 200.0 mmol) and the resulting mixture was extracted with CH<sub>2</sub>Cl<sub>2</sub> (50 mL × 4). The combined organic layer was dried over Na<sub>2</sub>SO<sub>4</sub>, filtered, and concentrated to give diamine (*R,R*)-**5** as a colorless oil (7.4 g, 76%, > 99% ee).  $[\alpha]_D^{25} = 42.0$  (CHCl<sub>3</sub>, *c* 1.0).

All the filtrates were combined and concentrated by rotary evaporation. The resulting residue was treated with NaOH solution (4 M, 100 mL, 400.0 mmol) and the resulting mixture was extracted with CH<sub>2</sub>Cl<sub>2</sub> (100 mL × 4). The combined organic layer was dried over Na<sub>2</sub>SO<sub>4</sub>, filtered, and concentrated to give enriched diamine (*S,S*)-**5** as a pale yellow oil, which was then dissolved in methanol (50 mL). To the stirred solution immersed in a 60 °C oil bath was added a hot homogenous solution of D-(-)-tartaric acid (10.5 g, 70.0 mmol) in methanol (50 mL) over 10 min, followed by the addition of glacial acetic acid (0.9 g, 15.0 mmol). At this point, a large amount of solid precipitated. The suspension was cooled to rt with vigorous stirring over 1 h, heated to reflux for 3 min using a heat gun, and cooled again to rt without stirring. After 2 h at rt, the mixture was filtered to give a white solid. The solid was washed with cold methanol (100 mL), dried under reduced pressure, and dissolved in hot water (25 mL). To the hot homogenous solution was added hot methanol (50 mL). A white solid precipitated immediately. The mixture stayed at rt for 12 h. The solid was collected by filtration, washed with cold methanol (100 mL), and dried under reduced pressure to give the D-(-)-tartaric acid salt (14.0 g). The salt was treated with NaOH solution (4 M, 50 mL, 200.0 mmol) and the resulting mixture was extracted with CH<sub>2</sub>Cl<sub>2</sub> (50 mL × 4). The combined organic layer was dried over Na<sub>2</sub>SO<sub>4</sub>, filtered, and concentrated to give diamine (*S,S*)-**5** as a colorless oil (7.1 g, 73%, > 99% ee).  $[\alpha]_D^{25} = -40.8$  (CHCl<sub>3</sub>, *c* 1.0).

(a) Pikul, S.; Corey, E. J. *Org. Synth.* **1993**, *71*, 22. (b) Larrow, J. F.; Jacobsen, E. N. *Org. Synth.* **1998**, *75*, 1.

The enantiomeric purity of the diamine was determined by chiral HPLC (chiralpak AD-column) after the derivatization to di-*m*-toluoyl amide by the following procedure: To a 5

mL vial charged with diamine **5** (0.016 g, 0.1 mmol) or the tartaric acid salt (0.031 g, 0.1 mmol) were added NaOH solution (1.0 M, 1.2 mL, 1.2 mmol) and CH<sub>2</sub>Cl<sub>2</sub> (2.4 mL). Upon stirring for 2 min, *m*-toluoyl chloride (0.034 g, 0.22 mmol) was added via syringe and the resulting mixture was stirred at rt for 5 min. A portion (60 uL) of the organic layer was diluted with 2-propanol (2 mL) and submitted to HPLC analysis.

**Table 1, entry 4**

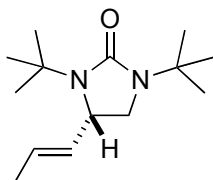

**3a**, Colorless oil; IR (film) 1692 cm<sup>-1</sup>; <sup>1</sup>H NMR (300 MHz, CDCl<sub>3</sub>) δ 5.69-5.50 (m, 2H), 3.94 (ddd, *J* = 8.1, 7.8, 2.1 Hz, 1H), 3.32 (t, *J* = 8.1 Hz, 1H), 2.89 (dd, *J* = 8.1, 2.1 Hz, 1H), 1.69 (d, *J* = 5.1 Hz, 3H), 1.34 (s, 9H), 1.30 (s, 9H); <sup>13</sup>C NMR (75 MHz, CDCl<sub>3</sub>) δ 160.8, 133.5, 126.7, 55.2, 53.8, 53.0, 48.5, 29.0, 27.6, 17.9; Anal. Calcd for C<sub>14</sub>H<sub>26</sub>N<sub>2</sub>O: C, 70.54; H, 10.99; N, 11.75. Found: C, 70.73; H, 10.84; N, 11.94.

**Table 1, entry 6**

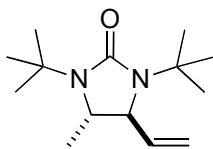

**4a**, Colorless oil; IR (film) 1688 cm<sup>-1</sup>; <sup>1</sup>H NMR (300 MHz, CDCl<sub>3</sub>) δ 5.91 (ddd, *J* = 17.1, 10.2, 8.4 Hz, 1H), 5.18 (d, *J* = 17.1 Hz, 1H), 5.08 (d, *J* = 10.2 Hz, 1H), 3.50 (d, *J* = 8.4 Hz, 1H), 3.26 (q, *J* = 6.0, 1H), 1.35 (s, 9H), 1.34 (s, 9H), 1.20 (d, *J* = 6.0 Hz, 3H); <sup>13</sup>C NMR (75 MHz, CDCl<sub>3</sub>) δ 158.0, 140.2, 115.6, 63.7, 55.4, 53.1, 52.6, 29.2, 29.0, 21.3.

Du, H.; Zhao, B.; Shi, Y. *J. Am. Chem. Soc.* **2007**, *129*, 762.

**Table 1, entry 7**

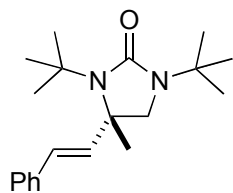

**3b**, Colorless oil; IR (film) 1690  $\text{cm}^{-1}$ ;  $^1\text{H}$  NMR (300 MHz,  $\text{CDCl}_3$ )  $\delta$  7.41-7.22 (m, 5H), 6.39 (s, 2H), 3.04 (d,  $J = 8.1$  Hz, 1H), 2.91 (d,  $J = 8.1$  Hz, 1H), 1.64 (s, 3H), 1.41 (s, 9H), 1.32 (s, 9H);  $^{13}\text{C}$  NMR (75 MHz,  $\text{CDCl}_3$ )  $\delta$  160.7, 137.0, 136.9, 128.9, 127.9, 127.5, 126.5, 60.2, 55.9, 55.7, 53.0, 30.1, 27.6, 23.6; Anal. Calcd for  $\text{C}_{20}\text{H}_{30}\text{N}_2\text{O}$ : C, 76.39; H, 9.62; N, 8.91. Found: C, 75.98; H, 9.46; N, 8.56.

**Table 1, entry 8**

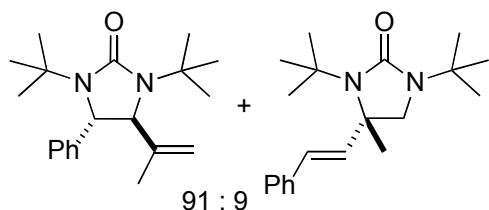

**4b**, Colorless oil; IR (film) 1687  $\text{cm}^{-1}$ ;  $^1\text{H}$  NMR (300 MHz,  $\text{CDCl}_3$ )  $\delta$  7.39-7.23 (m, 5H), 4.89 (s, 1H), 4.86-4.81 (m, 1H), 4.11 (d,  $J = 2.1$  Hz, 1H), 3.61 (d,  $J = 2.1$  Hz, 1H), 1.83 (s, 3H), 1.34 (s, 9H), 1.26 (s, 9H);  $^{13}\text{C}$  NMR (75 MHz,  $\text{CDCl}_3$ )  $\delta$  159.6, 147.6, 145.4, 129.1, 127.8, 125.6, 112.1, 66.9, 62.8, 53.8, 29.0, 28.7, 18.0; Anal. Calcd for  $\text{C}_{20}\text{H}_{30}\text{N}_2\text{O}$ : C, 76.39; H, 9.62; N, 8.91. Found: C, 76.46; H, 9.54; N, 8.67.

**Table 2, entry 1**

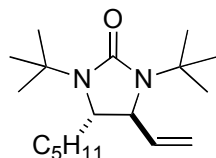

**4c**, Colorless oil; IR (film) 1689  $\text{cm}^{-1}$ ;  $^1\text{H}$  NMR (300 MHz,  $\text{CDCl}_3$ )  $\delta$  5.91 (ddd,  $J = 16.8$ , 10.2, 8.4 Hz, 1H), 5.17 (d,  $J = 16.8$  Hz, 1H), 5.07 (d,  $J = 10.2$  Hz, 1H), 3.65 (d,  $J = 8.4$  Hz, 1H),

3.09 (dd,  $J = 8.4, 3.3$  Hz, 1H), 1.58-1.48 (m, 2H), 1.44-1.21 (m, 6H), 1.35 (s, 9H), 1.34 (s, 9H), 0.89 (t,  $J = 6.9$  Hz, 3H);  $^{13}\text{C}$  NMR (75 MHz,  $\text{CDCl}_3$ )  $\delta$  158.4, 140.8, 115.2, 60.7, 59.8, 53.1, 52.7, 34.4, 32.0, 29.2, 29.0, 24.6, 22.9, 14.2.

Du, H.; Zhao, B.; Shi, Y. *J. Am. Chem. Soc.* **2007**, *129*, 762.

**Table 2, entry 2**

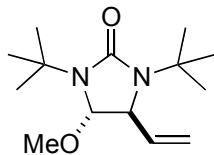

**4d**, Colorless oil; IR (film)  $1701\text{ cm}^{-1}$ ;  $^1\text{H}$  NMR (300 MHz,  $\text{C}_6\text{D}_6$ )  $\delta$  5.58 (ddd,  $J = 17.4, 10.5, 8.1$  Hz, 1H), 5.03 (d,  $J = 17.4$  Hz, 1H), 4.88 (d,  $J = 10.5$  Hz, 1H), 4.28 (s, 1H), 3.74 (d,  $J = 8.1$  Hz, 1H), 2.92 (s, 3H), 1.49 (s, 9H), 1.41 (s, 9H);  $^{13}\text{C}$  NMR (75 MHz,  $\text{C}_6\text{D}_6$ )  $\delta$  158.2, 139.7, 116.6, 90.5, 60.5, 53.9, 53.2, 51.1, 29.1, 28.9.

Du, H.; Zhao, B.; Shi, Y. *J. Am. Chem. Soc.* **2007**, *129*, 762.

**Table 2, entry 3**

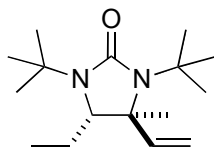

**4e**, Colorless oil; IR (film)  $1686\text{ cm}^{-1}$ ;  $^1\text{H}$  NMR (300 MHz,  $\text{CDCl}_3$ )  $\delta$  6.12 (dd,  $J = 17.4, 10.5$  Hz, 1H), 5.12 (d,  $J = 17.4$  Hz, 1H), 5.02 (d,  $J = 10.5$  Hz, 1H), 3.03 (t,  $J = 3.6$  Hz, 1H), 1.72-1.60 (m, 2H), 1.51 (s, 3H), 1.38 (s, 9H), 1.36 (s, 9H), 1.00 (t,  $J = 7.5$  Hz, 3H);  $^{13}\text{C}$  NMR (75 MHz,  $\text{CDCl}_3$ )  $\delta$  160.1, 144.6, 112.3, 64.2, 63.8, 56.4, 52.7, 30.2, 28.9, 24.8, 20.1, 9.4; HRMS Calcd for  $\text{C}_{16}\text{H}_{31}\text{N}_2\text{O}$  ( $\text{M} + \text{H}^+$ ): 267.2431. Found: 267.2432.

**Table 2, entry 4**

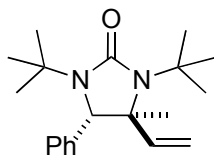

**4f**, Colorless oil; IR (film) 1687  $\text{cm}^{-1}$ ;  $^1\text{H}$  NMR (300 MHz,  $\text{CDCl}_3$ )  $\delta$  7.49 (d,  $J = 7.8$  Hz, 1H), 7.36-7.20 (m, 3H), 7.02-6.97 (m, 1H), 6.24 (dd,  $J = 17.4, 10.8$  Hz, 1H), 5.13 (d,  $J = 10.8$  Hz, 1H), 5.09 (d,  $J = 17.4$  Hz, 1H), 4.04 (s, 1H), 1.42 (s, 9H), 1.23 (s, 9H), 0.97 (s, 3H);  $^{13}\text{C}$  NMR (75 MHz,  $\text{CDCl}_3$ )  $\delta$  160.8, 144.9, 140.7, 129.2, 128.4, 128.1, 128.0, 113.0, 69.0, 64.8, 56.3, 54.2, 30.0, 28.8, 23.0; Anal. Calcd for  $\text{C}_{20}\text{H}_{30}\text{N}_2\text{O}$ : C, 76.39; H, 9.62; N, 8.91. Found: C, 76.48; H, 9.51; N, 8.75.

**Table 2, entry 5**

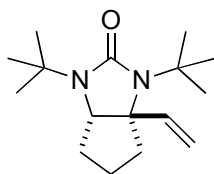

**4g**, Colorless oil; IR (film) 1681  $\text{cm}^{-1}$ ;  $^1\text{H}$  NMR (300 MHz,  $\text{CDCl}_3$ )  $\delta$  6.01 (dd,  $J = 17.7, 10.5$  Hz, 1H), 5.13 (d,  $J = 17.7$  Hz, 1H), 5.04 (d,  $J = 10.5$  Hz, 1H), 3.37 (dd,  $J = 7.2, 6.6$  Hz, 1H), 2.31-2.21 (m, 1H), 2.13-2.02 (m, 1H), 1.96-1.85 (m, 1H), 1.81-1.70 (m, 1H), 1.62-1.30 (m, 2H), 1.41 (s, 9H), 1.35 (s, 9H);  $^{13}\text{C}$  NMR (75 MHz,  $\text{CDCl}_3$ )  $\delta$  159.0, 145.6, 112.0, 69.6, 67.1, 54.9, 53.3, 39.4, 37.6, 29.8, 29.0, 24.4.

Du, H.; Zhao, B.; Shi, Y. *J. Am. Chem. Soc.* **2007**, *129*, 762.

**Table 2, entry 6**

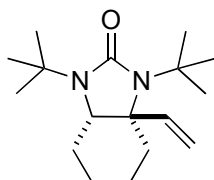



**4h**, Colorless oil; IR (film) 1686  $\text{cm}^{-1}$ ;  $^1\text{H}$  NMR (300 MHz,  $\text{CDCl}_3$ )  $\delta$  6.16 (dd,  $J = 17.4, 11.1$  Hz, 1H), 5.15 (d,  $J = 17.4$  Hz, 1H), 5.08 (d,  $J = 11.1$  Hz, 1H), 3.05 (dd,  $J = 9.3, 4.8$  Hz, 1H), 2.31-2.21 (m, 1H), 1.83-1.20 (m, 7H), 1.39 (s, 9H), 1.36 (s, 9H);  $^{13}\text{C}$  NMR (75 MHz,  $\text{CDCl}_3$ )  $\delta$  160.1, 143.2, 113.1, 64.3, 60.1, 56.4, 52.6, 30.5, 29.8, 29.0, 28.9, 21.3, 19.9.

Du, H.; Zhao, B.; Shi, Y. *J. Am. Chem. Soc.* **2007**, *129*, 762.

**Table 2, entry 7**

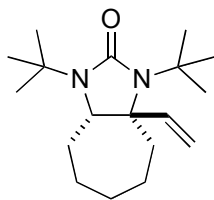

**4i**, Colorless oil; IR (film) 1686  $\text{cm}^{-1}$ ;  $^1\text{H}$  NMR (300 MHz,  $\text{CDCl}_3$ )  $\delta$  6.03 (dd,  $J = 17.7, 10.5$  Hz, 1H), 5.10 (d,  $J = 17.7$  Hz, 1H), 5.08 (d,  $J = 10.5$  Hz, 1H), 3.17 (d,  $J = 8.7$  Hz, 1H), 2.48-2.39 (m, 1H), 1.98-1.85 (m, 1H), 1.80-1.13 (m, 8H), 1.36 (s, 9H), 1.35 (s, 9H);  $^{13}\text{C}$  NMR (75 MHz,  $\text{CDCl}_3$ )  $\delta$  159.8, 142.4, 112.7, 68.6, 64.9, 56.5, 52.9, 34.3, 30.7, 30.2, 29.1, 26.5, 24.4; Anal. Calcd for  $\text{C}_{18}\text{H}_{32}\text{N}_2\text{O}$ : C, 73.92; H, 11.03; N, 9.58. Found: C, 73.76; H, 10.93; N, 9.37.

**Table 2, entry 8**

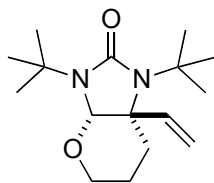

**4j**, Colorless oil; IR (film) 1694  $\text{cm}^{-1}$ ;  $^1\text{H}$  NMR (300 MHz,  $\text{CDCl}_3$ )  $\delta$  5.94 (dd,  $J = 18.0, 10.8$  Hz, 1H), 5.23 (d,  $J = 18.0$  Hz, 1H), 5.19 (d,  $J = 10.8$  Hz, 1H), 4.55 (s, 1H), 3.75-3.56 (m, 2H), 2.16-1.60 (m, 4H), 1.41 (s, 9H), 1.40 (s, 9H);  $^{13}\text{C}$  NMR (75 MHz,  $\text{CDCl}_3$ )  $\delta$  159.9, 141.9, 114.9, 88.0, 62.7, 57.4, 56.0, 53.0, 29.4, 28.5, 25.1, 19.7; HRMS Calcd for  $\text{C}_{16}\text{H}_{29}\text{N}_2\text{O}_2$  ( $\text{M} + \text{H}^+$ ): 281.2224. Found: 281.2229.

**Table 2, entry 9**

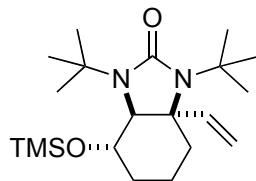

**4k**, Colorless oil; IR (film) 1688  $\text{cm}^{-1}$ ;  $^1\text{H}$  NMR (300 MHz,  $\text{CDCl}_3$ )  $\delta$  6.06 (dd,  $J = 17.7, 10.8$  Hz, 1H), 5.11 (d,  $J = 17.7$  Hz, 1H), 5.05 (d,  $J = 10.8$  Hz, 1H), 3.78-3.73 (m, 1H), 3.00 (d,  $J = 2.7$  Hz, 1H), 2.15-2.06 (m, 1H), 2.00-1.75 (m, 2H), 1.72-1.22 (m, 3H), 1.37 (s, 18H), 0.08 (s, 9H);  $^{13}\text{C}$  NMR (75 MHz,  $\text{CDCl}_3$ )  $\delta$  160.1, 144.2, 112.9, 72.8, 66.2, 64.4, 56.3, 53.1, 29.4, 29.1, 26.2, 25.9, 16.6, 0.75; Anal. Calcd for  $\text{C}_{20}\text{H}_{38}\text{N}_2\text{O}_2\text{Si}$ : C, 65.52; H, 10.45; N, 7.64. Found: C, 65.59; H, 10.24; N, 7.41.

**Table 2, entry 10**

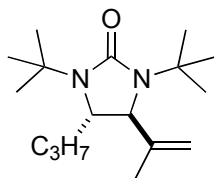

**4l**, Colorless oil; IR (film) 1687  $\text{cm}^{-1}$ ;  $^1\text{H}$  NMR (300 MHz,  $\text{CDCl}_3$ )  $\delta$  4.92-4.88 (m, 1H), 4.81-4.78 (m, 1H), 3.61 (s, 1H), 3.10 (dd,  $J = 6.9, 3.0$  Hz, 1H), 1.73 (s, 3H), 1.56-1.28 (m, 4H), 1.36 (s, 9H), 1.35 (s, 9H), 0.95 (t,  $J = 7.2$  Hz, 3H);  $^{13}\text{C}$  NMR (75 MHz,  $\text{CDCl}_3$ )  $\delta$  158.7, 147.5, 111.7, 62.6, 58.9, 53.4, 52.6, 38.2, 29.2, 28.9, 18.2, 17.8, 14.4.

Du, H.; Zhao, B.; Shi, Y. *J. Am. Chem. Soc.* **2007**, *129*, 762.

**Table 2, entry 11**

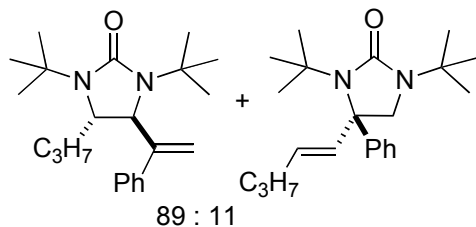

**4m**, Colorless oil; IR (film) 1686  $\text{cm}^{-1}$ ;  $^1\text{H}$  NMR (300 MHz,  $\text{CDCl}_3$ )  $\delta$  7.51-7.29 (m, 5H), 5.32 (s, 2H), 4.14 (s, 1H), 3.08 (t,  $J = 5.4$  Hz, 1H), 1.52-0.94 (m, 4H), 1.44 (s, 9H), 1.31 (s, 9H), 0.74 (t,  $J = 7.2$  Hz, 3H);  $^{13}\text{C}$  NMR (75 MHz,  $\text{CDCl}_3$ )  $\delta$  158.9, 149.9, 140.0, 128.7, 128.0, 127.2, 113.5, 60.1, 59.1, 53.5, 52.5, 38.1, 29.1, 17.7, 14.1; HRMS Calcd for  $\text{C}_{22}\text{H}_{35}\text{N}_2\text{O}$  ( $\text{M} + \text{H}^+$ ): 343.2744. Found: 343.2751.

**Table 2, entry 12**

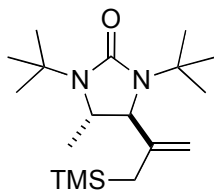

**4n**, Colorless oil; IR (film) 1687  $\text{cm}^{-1}$ ;  $^1\text{H}$  NMR (300 MHz,  $\text{CDCl}_3$ )  $\delta$  4.97 (d,  $J = 1.2$  Hz, 1H), 4.71 (d,  $J = 1.2$  Hz, 1H), 3.32 (s, 1H), 3.25 (q,  $J = 6.0$  Hz, 1H), 1.55 (d,  $J = 15.0$  Hz, 1H), 1.35 (s, 9H), 1.32 (s, 9H), 1.30 (d,  $J = 15.0$  Hz, 1H), 1.21 (d,  $J = 6.0$  Hz, 3H), 0.05 (s, 9H);  $^{13}\text{C}$  NMR (75 MHz,  $\text{CDCl}_3$ )  $\delta$  158.8, 147.0, 109.0, 65.7, 54.6, 53.1, 52.4, 29.15, 29.07, 24.0, 22.5, -0.62; HRMS Calcd for  $\text{C}_{18}\text{H}_{37}\text{N}_2\text{OSi}$  ( $\text{M} + \text{H}^+$ ): 325.2670. Found: 325.2674.

**Table 2, entry 13**

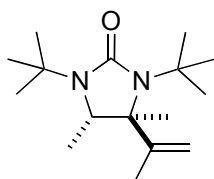

**4o**, Colorless oil; IR (film) 1685  $\text{cm}^{-1}$ ;  $^1\text{H}$  NMR (300 MHz,  $\text{CDCl}_3$ )  $\delta$  4.95 (s, 1H), 4.89 (s, 1H), 3.25 (q,  $J = 6.0$  Hz, 1H), 1.82 (s, 3H), 1.43 (s, 9H), 1.36 (s, 9H), 1.11 (t,  $J = 6.0$  Hz, 3H);  $^{13}\text{C}$  NMR (75 MHz,  $\text{CDCl}_3$ )  $\delta$  160.6, 148.9, 112.7, 66.5, 57.4, 55.8, 54.0, 29.8, 29.0, 20.9, 20.0, 17.8; Anal. Calcd for  $\text{C}_{16}\text{H}_{30}\text{N}_2\text{O}$ : C, 72.13; H, 11.35; N, 10.51. Found: C, 72.32; H, 11.19; N, 10.44.

**Table 2, entry 14**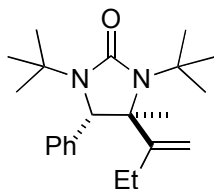

**4p**, Colorless oil; IR (film) 1687  $\text{cm}^{-1}$ ;  $^1\text{H}$  NMR (300 MHz,  $\text{CDCl}_3$ )  $\delta$  7.52 (d,  $J = 7.5$  Hz, 1H), 7.36-7.18 (m, 3H), 6.89 (dt,  $J = 6.6, 1.8$  Hz, 1H), 4.96 (s, 1H), 4.87 (s, 1H), 4.22 (s, 1H), 2.26 (q,  $J = 6.9$  Hz, 2H), 1.42 (s, 9H), 1.22 (s, 9H), 1.20 (t,  $J = 6.9$  Hz, 3H), 0.96 (s, 3H);  $^{13}\text{C}$  NMR (75 MHz,  $\text{CDCl}_3$ )  $\delta$  161.7, 154.9, 141.4, 128.3, 128.2, 128.0, 127.9, 127.7, 110.1, 67.1, 66.9, 56.0, 55.3, 29.6, 28.9, 24.4, 23.8, 12.9; Anal. Calcd for  $\text{C}_{22}\text{H}_{34}\text{N}_2\text{O}$ : C, 77.14; H, 10.01; N, 8.18. Found: C, 77.51; H, 9.75; N, 8.15.

**Scheme 2**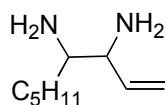

**(±)-5**, Colorless oil; IR (film) 3281, 3077, 1580, 1466  $\text{cm}^{-1}$ ;  $^1\text{H}$  NMR (300 MHz,  $\text{CDCl}_3$ )  $\delta$  5.82 (ddd,  $J = 17.4, 10.5, 6.6$  Hz, 1H), 5.18 (ddd,  $J = 17.4, 1.5, 1.2$  Hz, 1H), 5.12 (ddd,  $J = 10.5, 1.5, 0.9$  Hz, 1H), 3.20-3.13 (m, 1H), 2.64-2.56 (m, 1H), 1.60-1.09 (m, 12H), 0.88 (t,  $J = 6.6$  Hz, 3H);  $^{13}\text{C}$  NMR (75 MHz,  $\text{CDCl}_3$ )  $\delta$  141.4, 115.0, 59.0, 55.5, 34.4, 32.1, 26.3, 22.7, 14.2; Anal. Calcd for  $\text{C}_9\text{H}_{20}\text{N}_2$ : C, 69.17; H, 12.90; N, 17.93. Found: C, 69.48; H, 12.96; N, 17.84.

**Scheme 3, compounds 7, 8a, and 8b**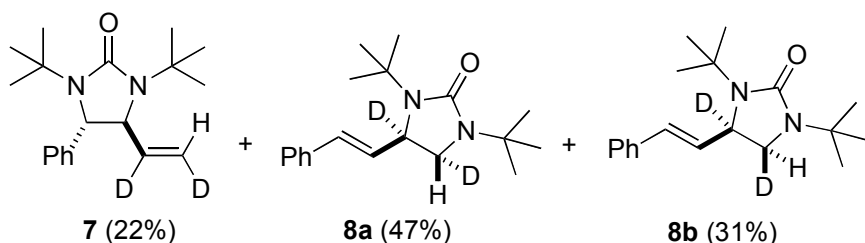

Colorless oil; IR (film) 1688  $\text{cm}^{-1}$ ;  $^1\text{H}$  NMR (300 MHz,  $\text{CDCl}_3$ ) **7**:  $\delta$  7.40-7.24 (m, 5H), 5.18 (s, 1H), 4.16 (s, 1H), 3.65 (s, 1H), 1.33 (s, 9H), 1.28 (s, 9H); **8a**:  $\delta$  7.40-7.24 (m, 5H), 6.50 (d,  $J = 15.9$  Hz, 1H), 6.36 (d,  $J = 15.9$  Hz, 1H), 2.99 (s, 1H), 1.38 (s, 9H), 1.33 (s, 9H); **8b**:  $\delta$  7.40-7.24 (m, 5H), 6.50 (d,  $J = 15.9$  Hz, 1H), 6.36 (d,  $J = 15.9$  Hz, 1H), 3.41 (s, 1H), 1.38 (s, 9H), 1.33 (s, 9H);  $^{13}\text{C}$  NMR (100 MHz,  $\text{CDCl}_3$ )  $\delta$  160.8, 159.2, 144.2, 140.8, 140.6, 140.4, 136.8, 131.8, 131.7, 130.9, 129.0, 128.9, 128.1, 127.9, 126.6, 125.9, 115.7, 115.4, 115.2, 64.9, 63.4, 55.3, 55.1, 54.8, 54.0, 53.7, 53.5, 53.2, 48.2, 48.0, 47.8, 29.1, 28.9, 27.7; HRMS Calcd for  $\text{C}_{19}\text{H}_{27}\text{D}_2\text{N}_2\text{O}$  ( $\text{M} + \text{H}^+$ ): 303.2400. Found: 303.2404.

**The chromatograms for the determination of enantioselectivity**  
**Scheme 2, (R,R)-5**

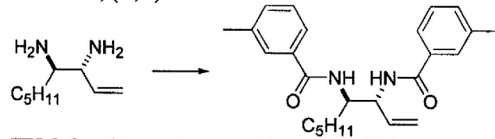

**HPLC Conditions:** Column: Chiralpak AD (Column No. AD00CE-EA001), Daicel Chemical Industries, Ltd.. Eluent: Hexanes/IPA (90/10); Flow rate: 1.0 mL/min; Detection: UV210 nm

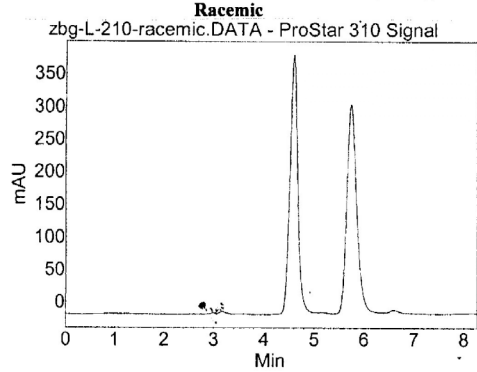

| Index | Time [Min] | Area % [%] |
|-------|------------|------------|
| 1     | 4.60       | 49.557     |
| 2     | 5.74       | 50.443     |
| Total |            | 100.000    |

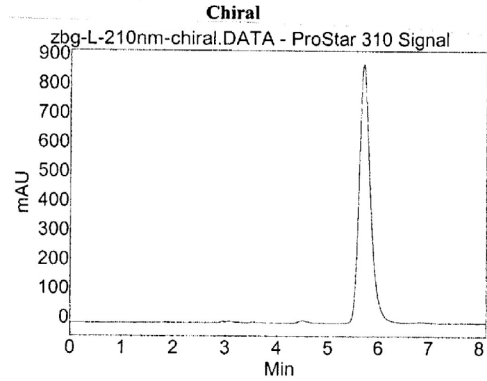

| Index | Time [Min] | Area % [%] |
|-------|------------|------------|
| 1     | 4.49       | 0.420      |
| 2     | 5.70       | 99.580     |
| Total |            | 100.000    |

**Scheme 2, (S,S)-5**

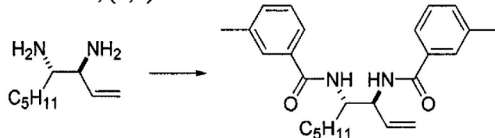

**HPLC Conditions:** Column: Chiralpak AD (Column No. AD00CE-EA001), Daicel Chemical Industries, Ltd.. Eluent: Hexanes/IPA (90/10); Flow rate: 1.0 mL/min; Detection: UV210 nm

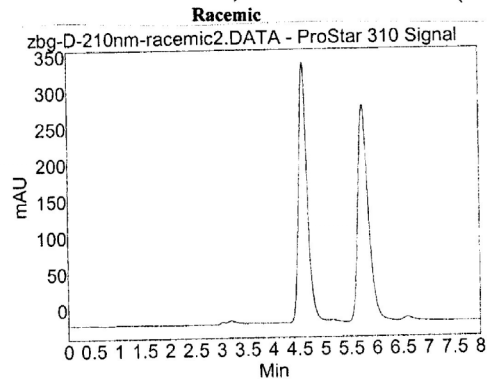

| Index | Time [Min] | Area % [%] |
|-------|------------|------------|
| 1     | 4.59       | 49.120     |
| 2     | 5.74       | 50.880     |

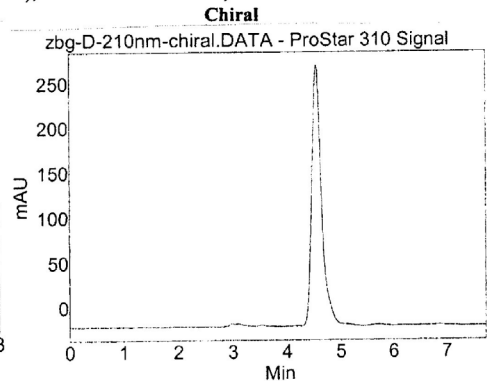

| Index | Time [Min] | Area % [%] |
|-------|------------|------------|
| 1     | 4.55       | 99.575     |
| 2     | 5.71       | 0.425      |

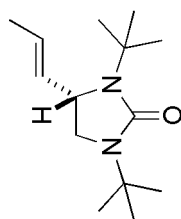

Table 1, entry 4

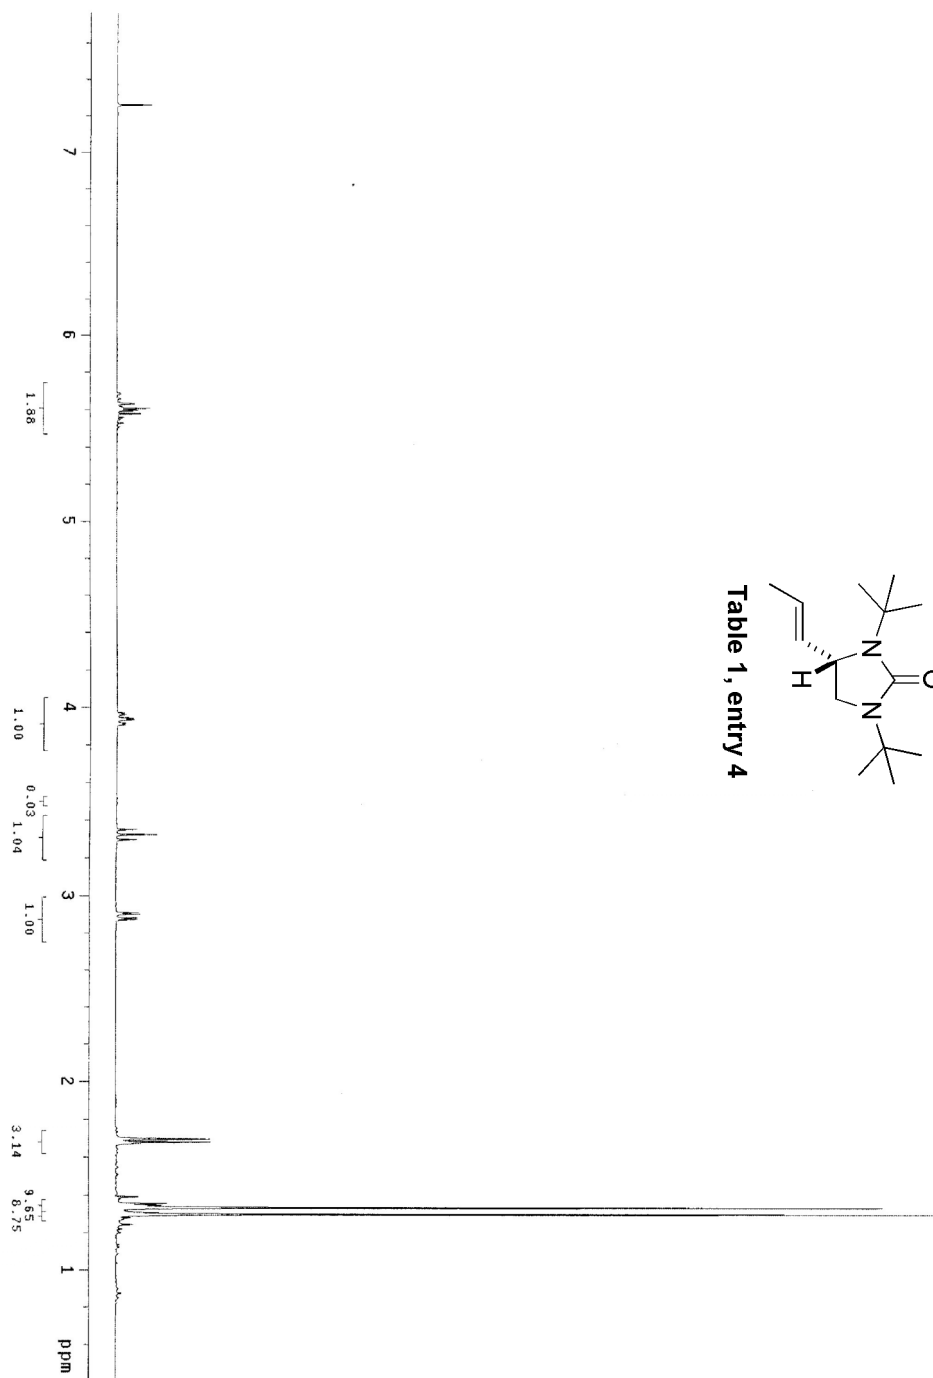

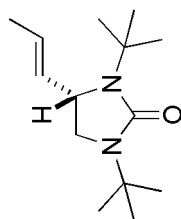

Table 1, entry 4

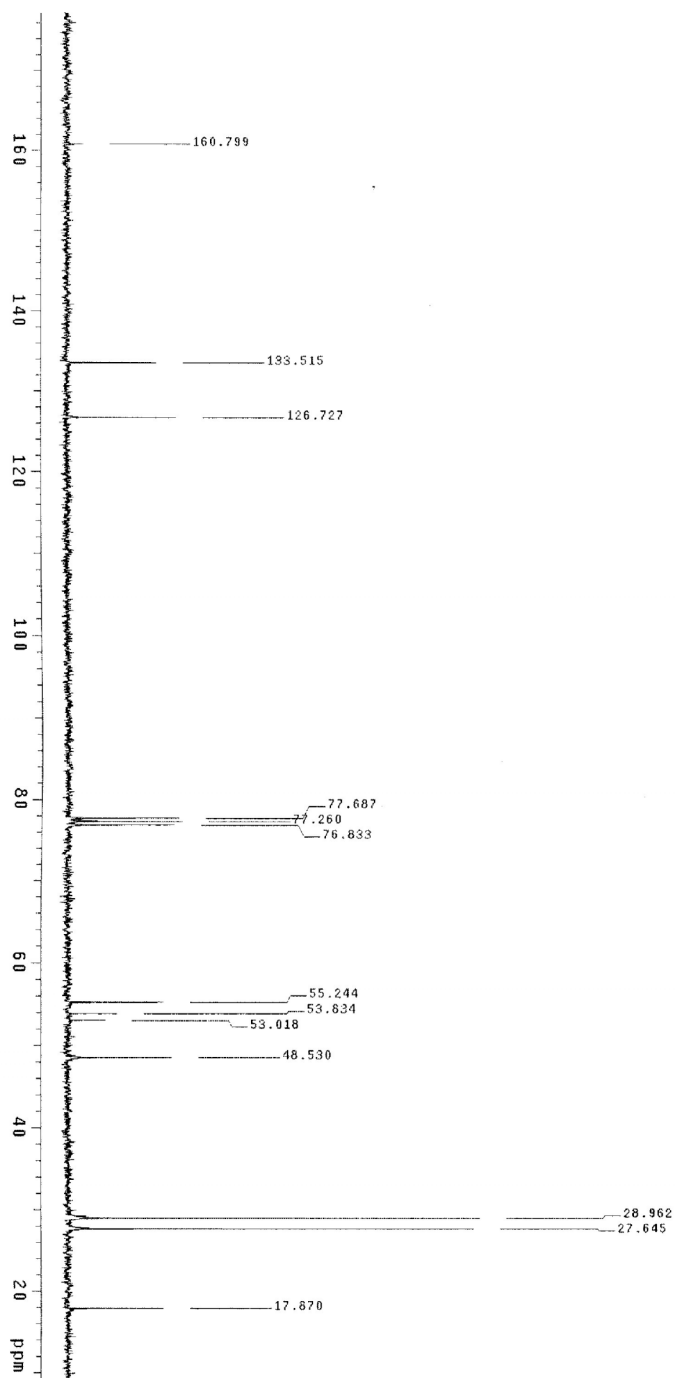



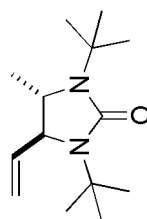

Table 1, entry 6

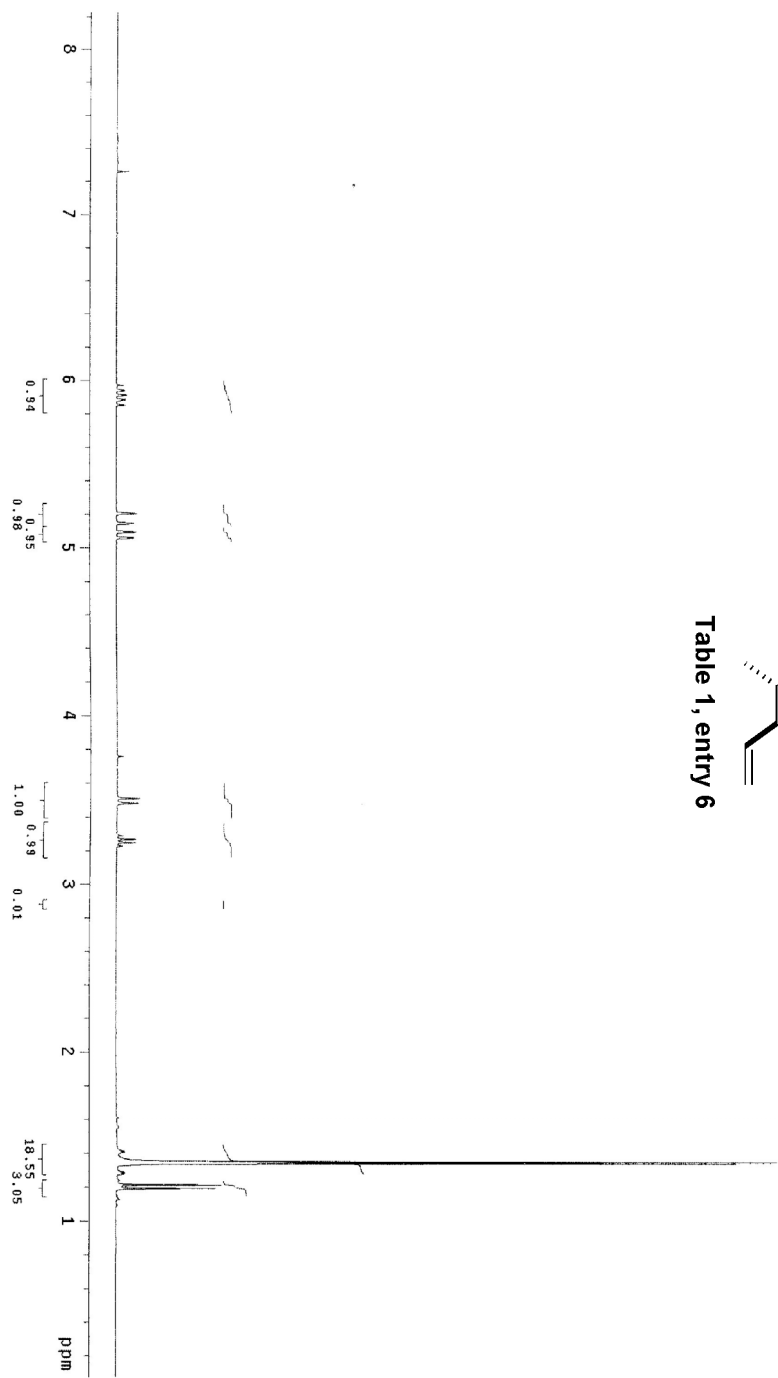

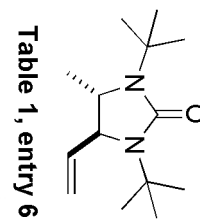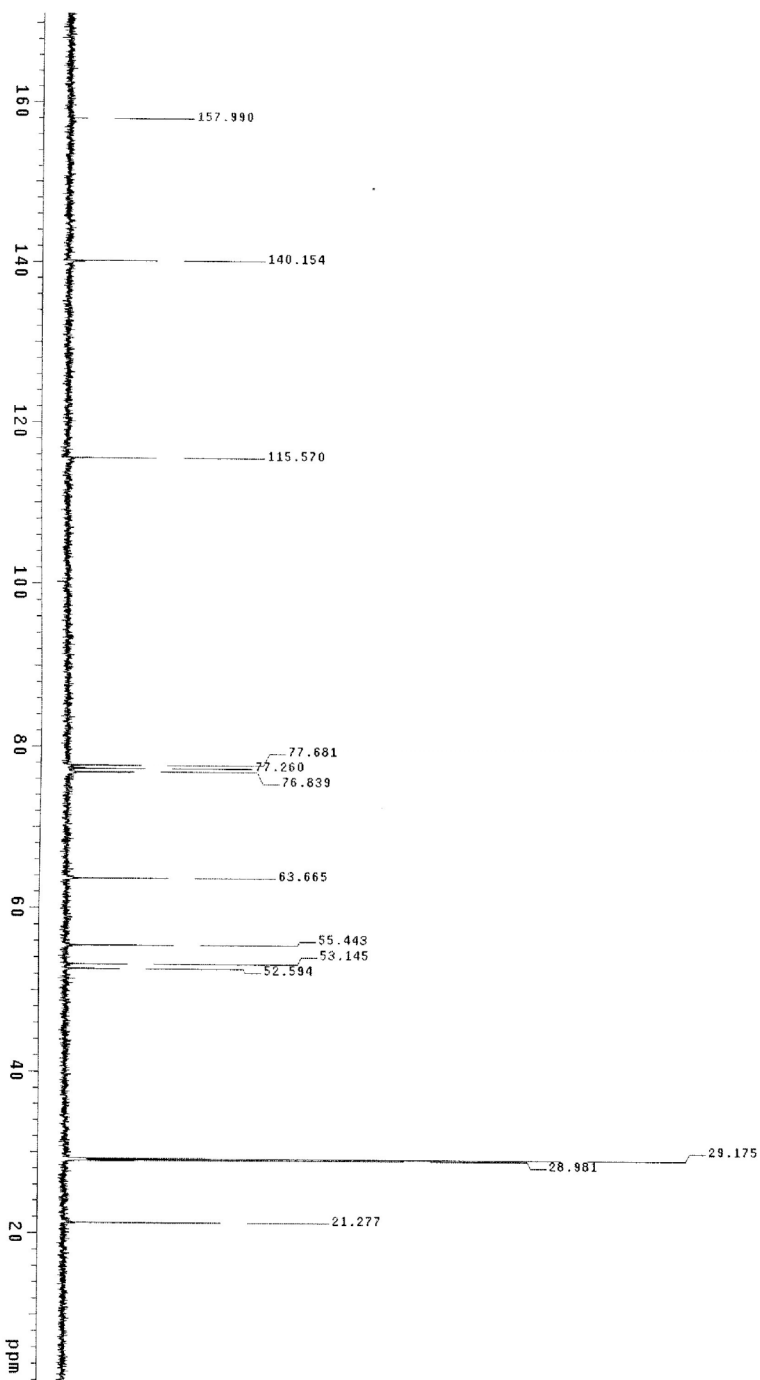

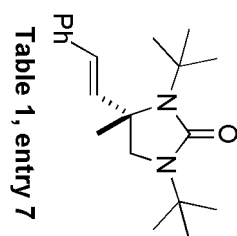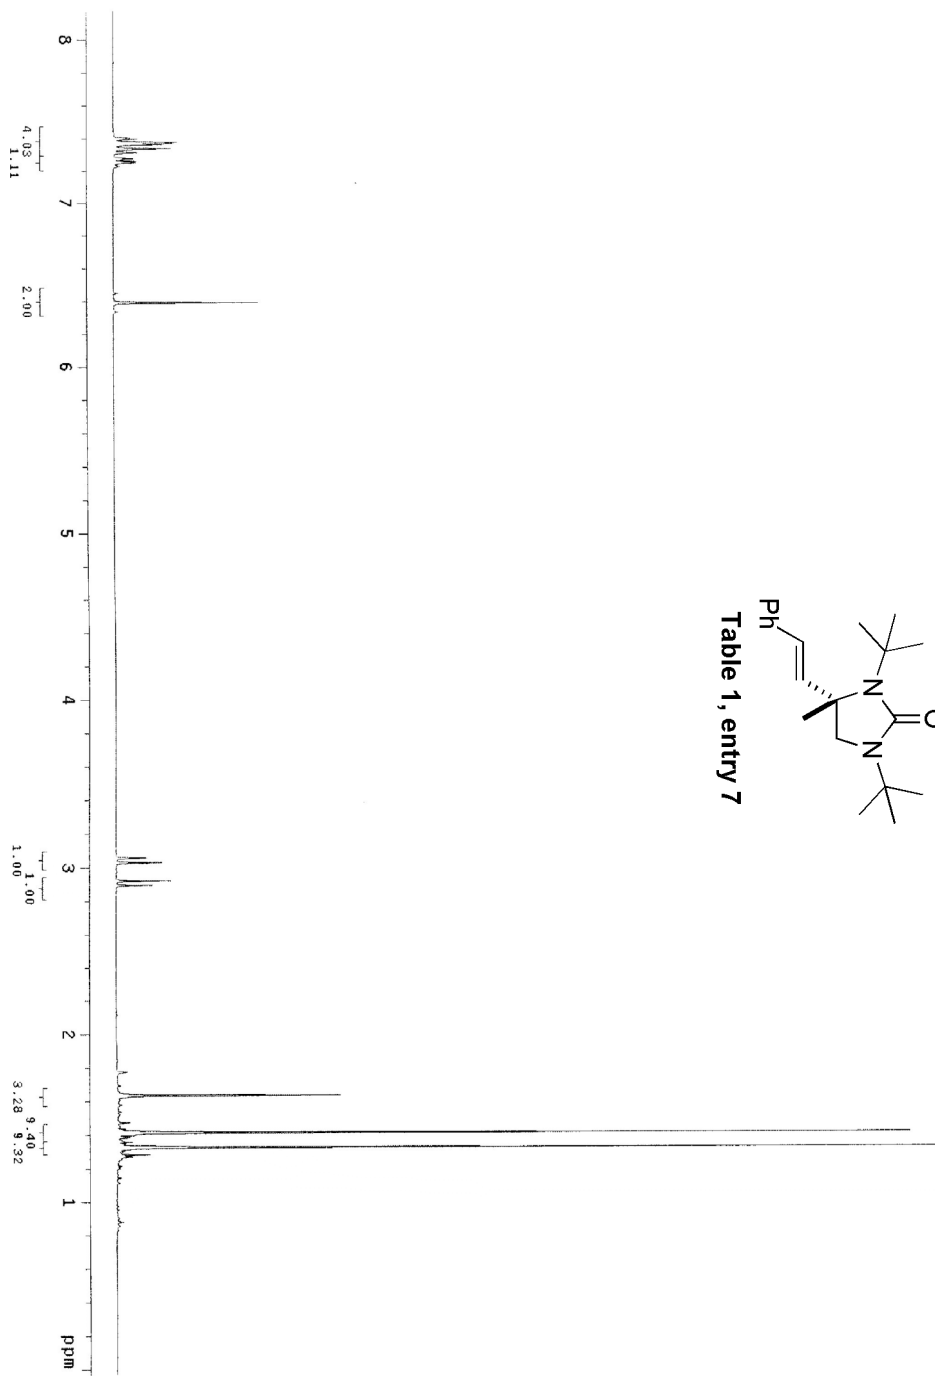

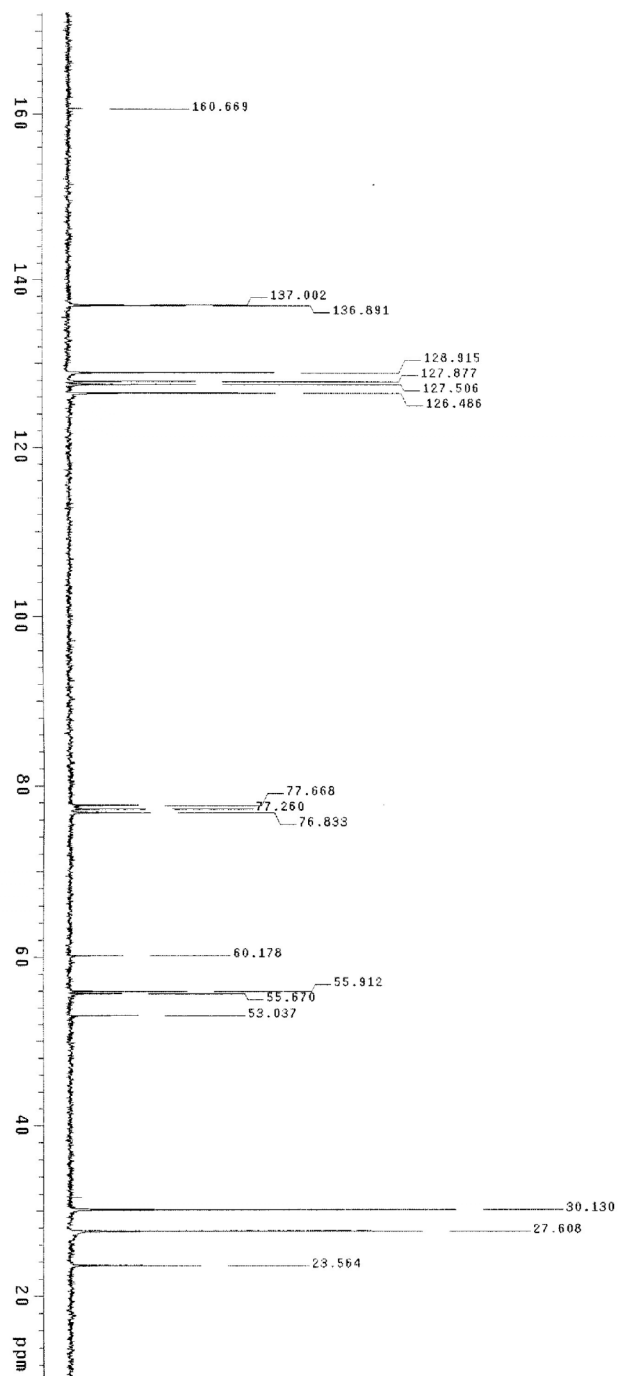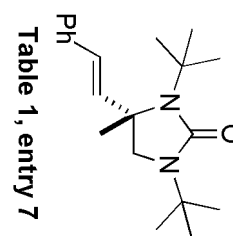

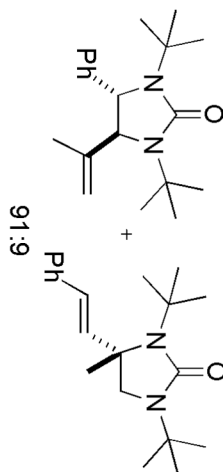

Table 1, entry 8

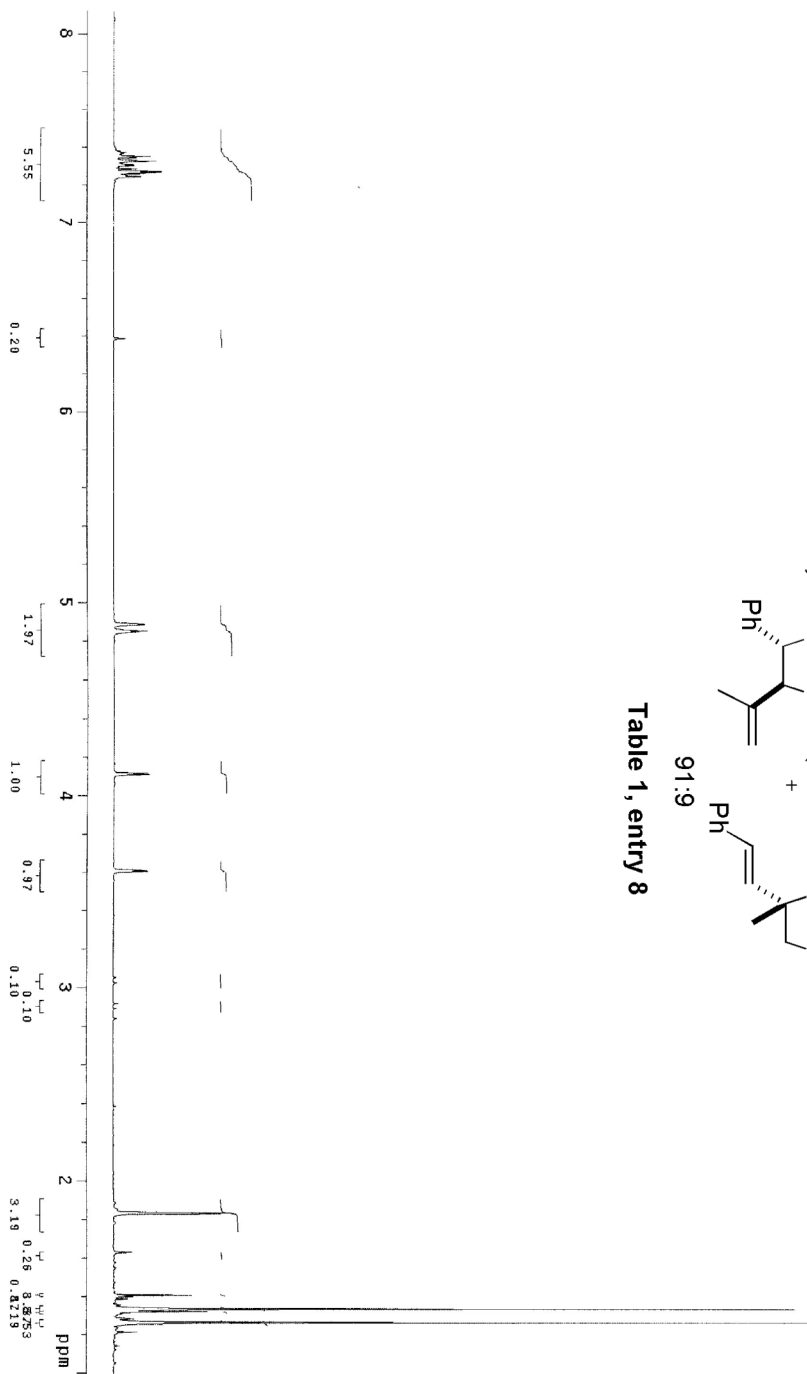

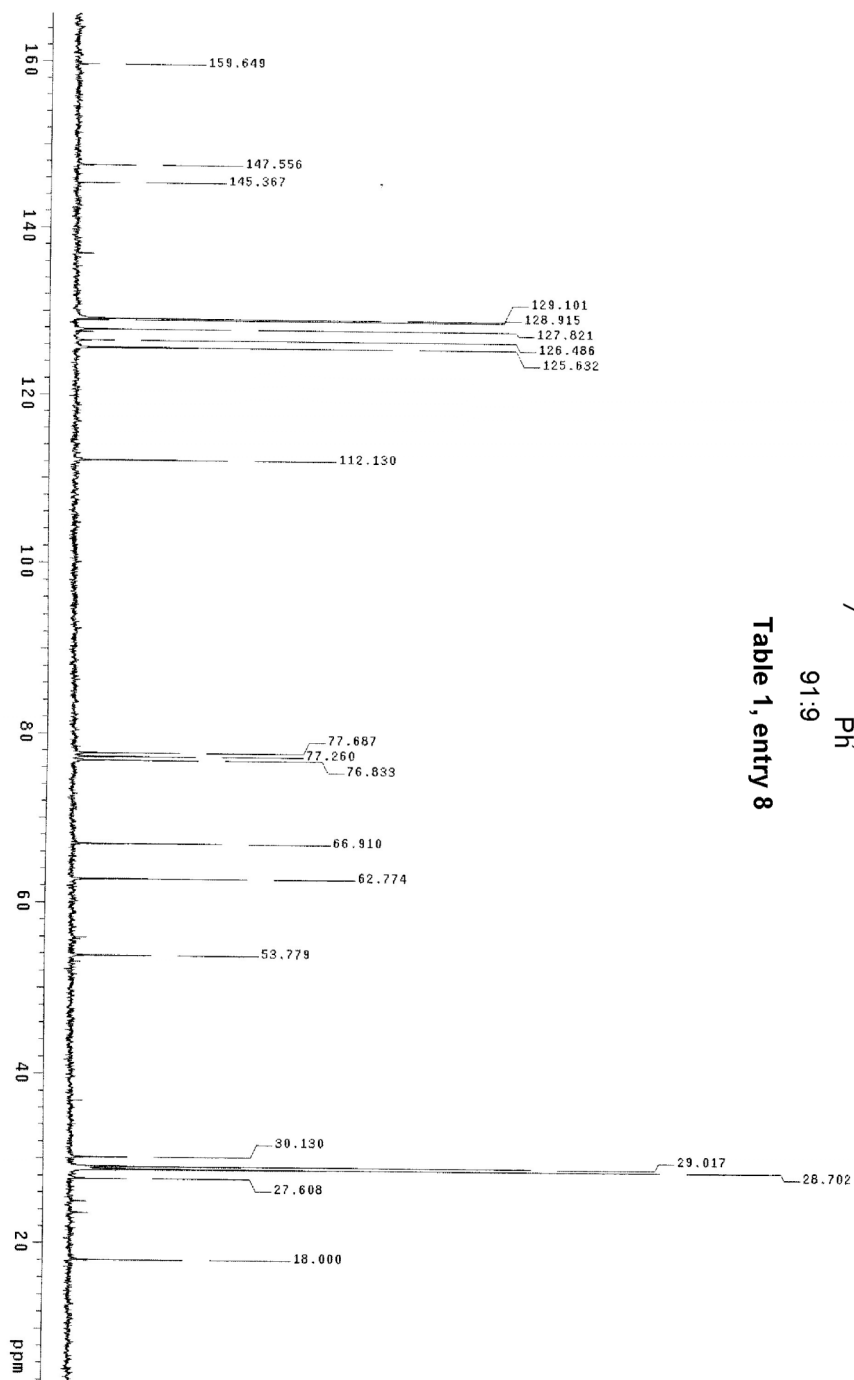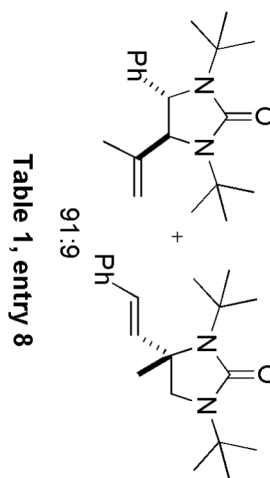

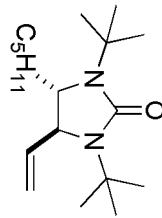

Table 2, entry 1

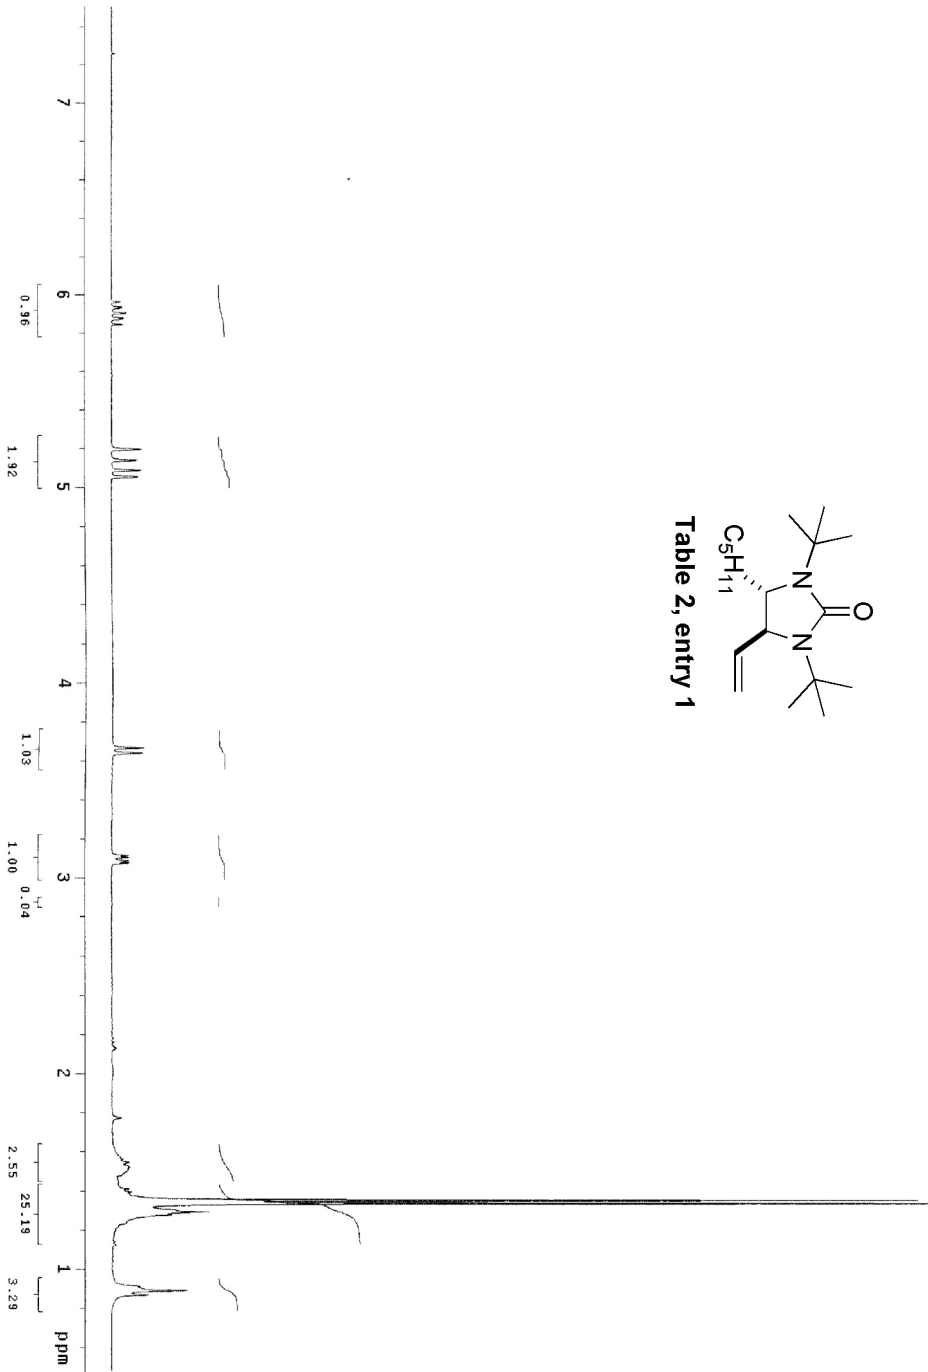

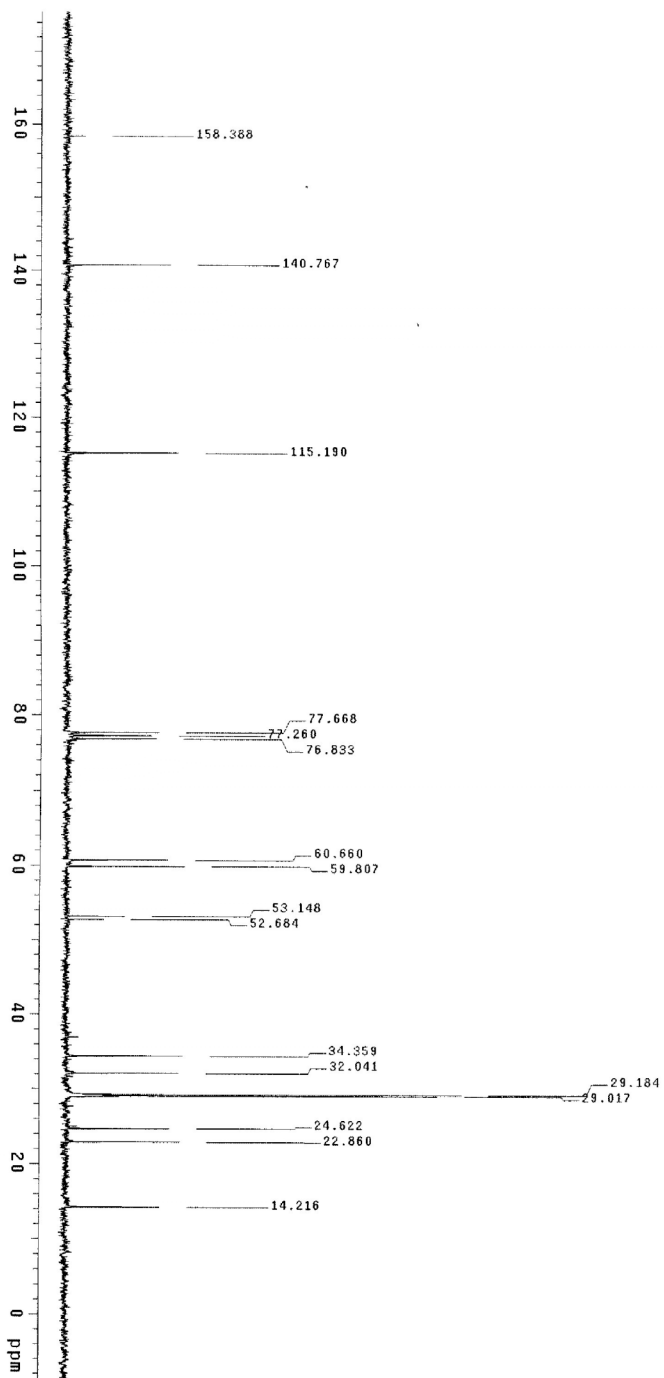

Table 2, entry 1

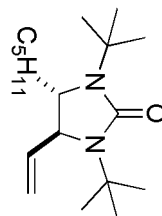



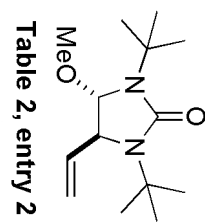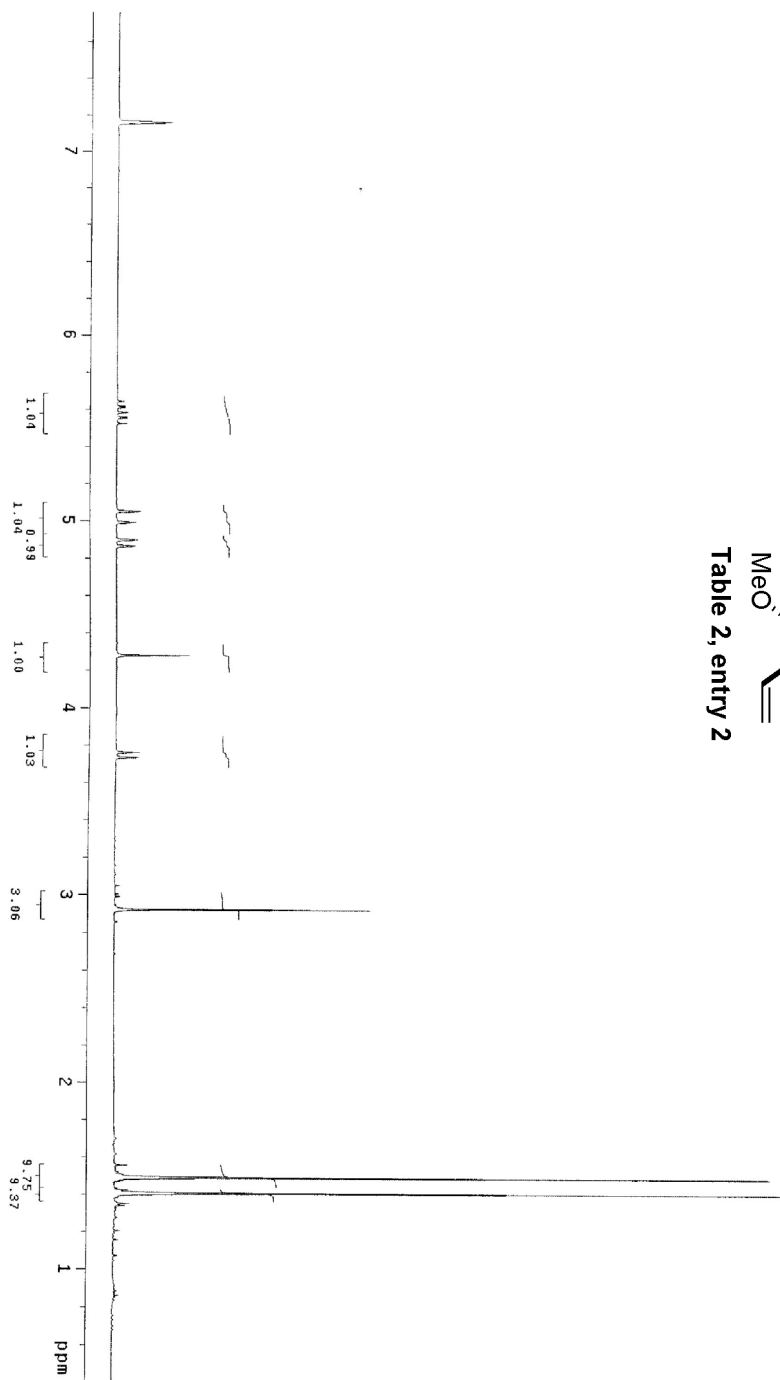

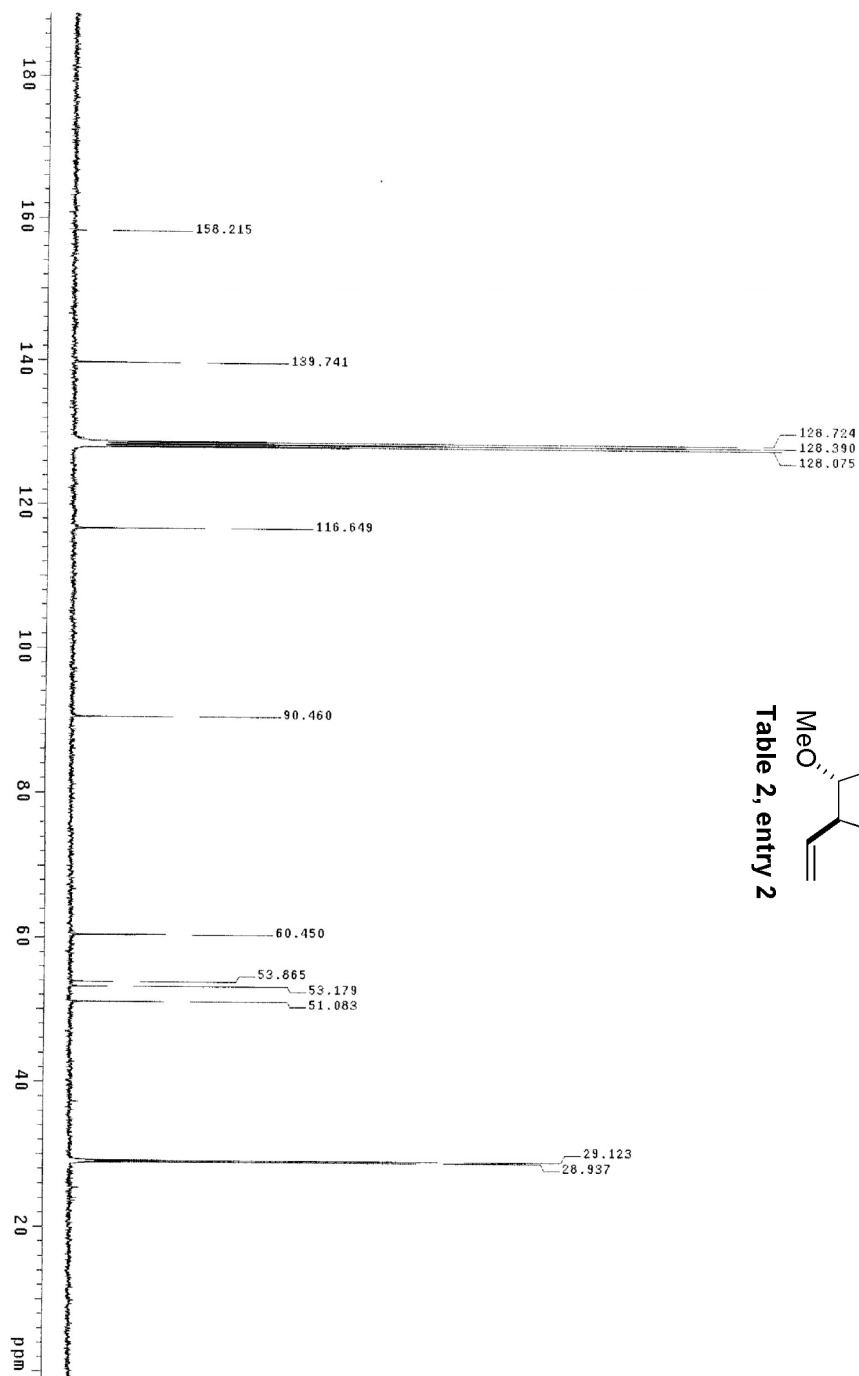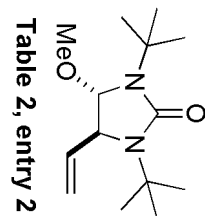

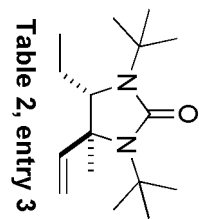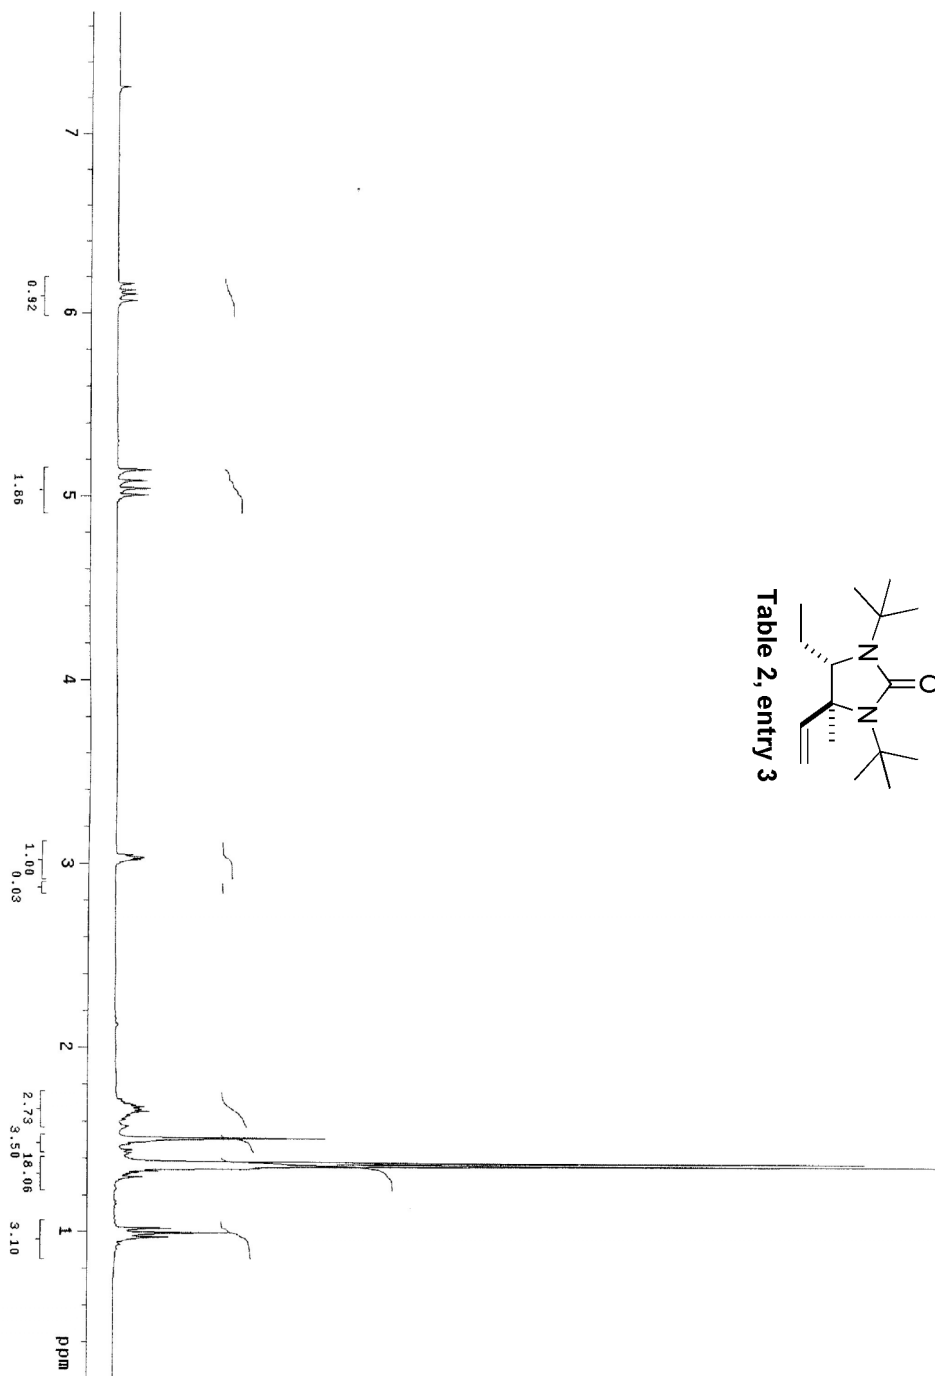

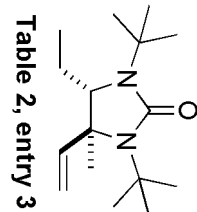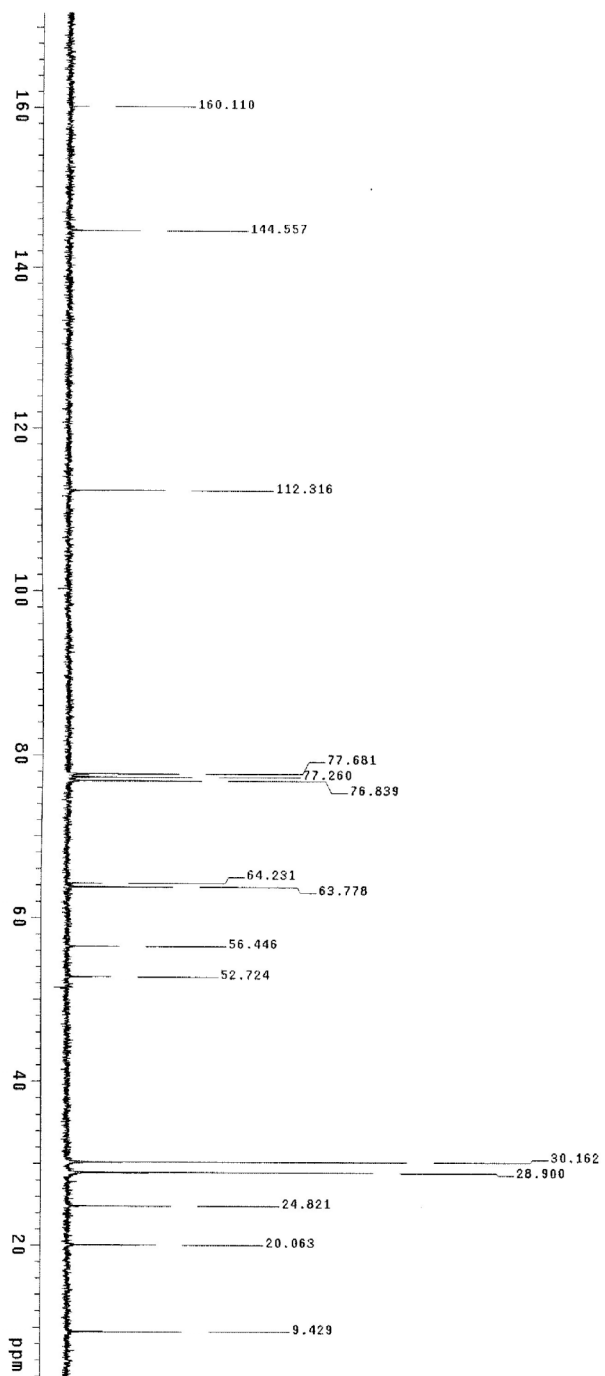

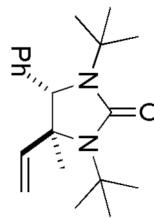

Table 2, entry 4

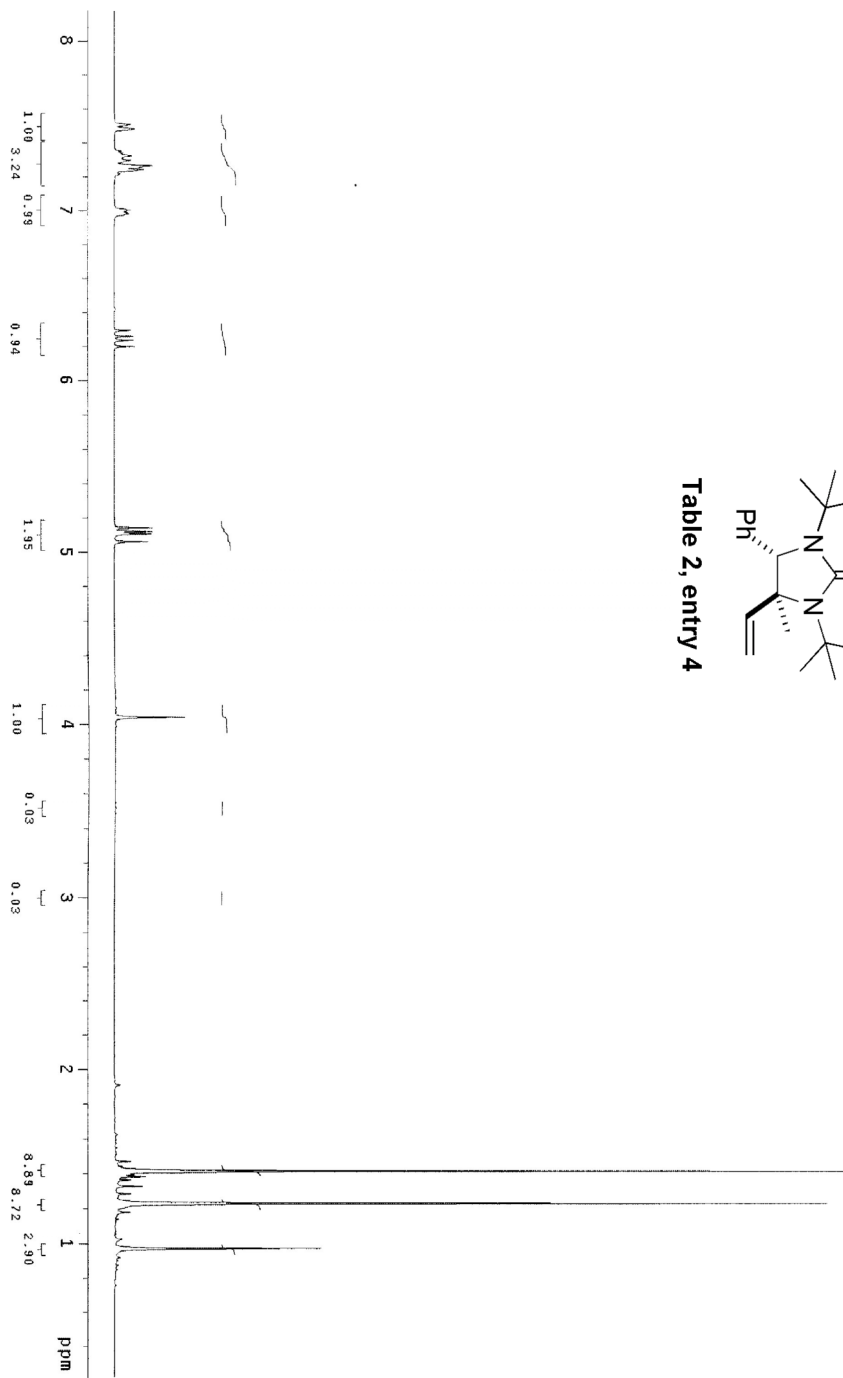

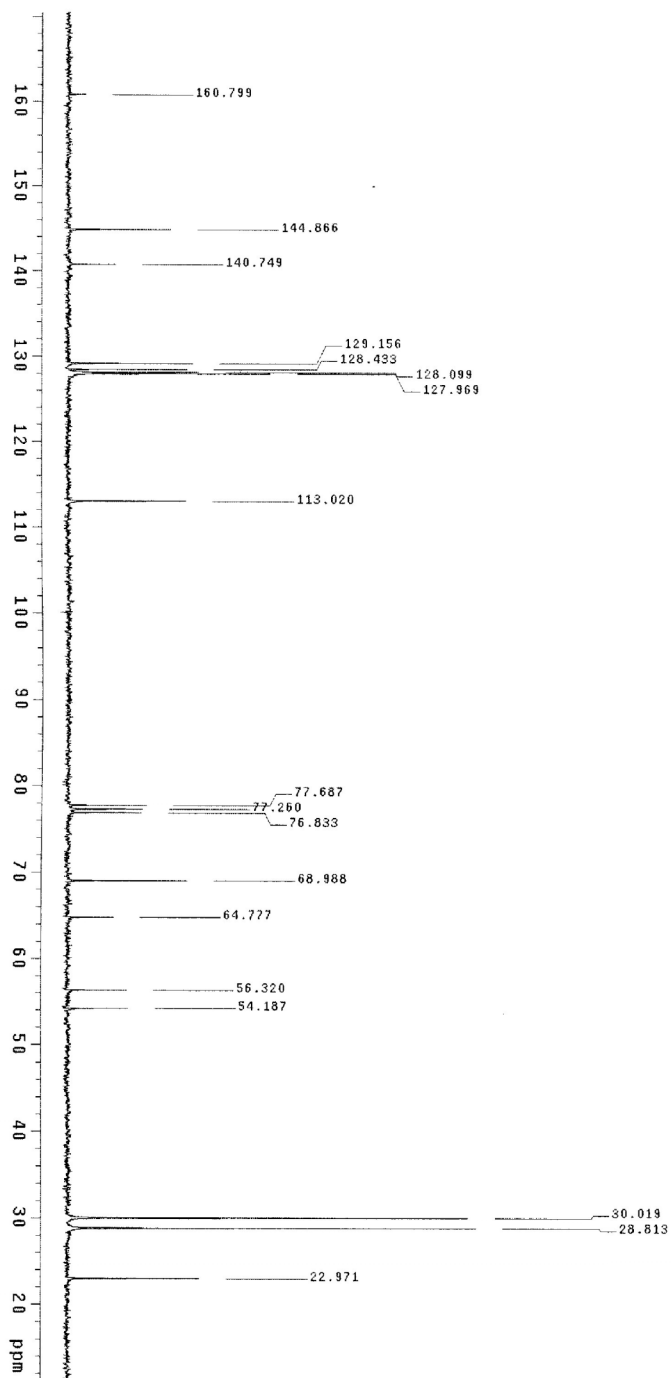

Table 2, entry 4

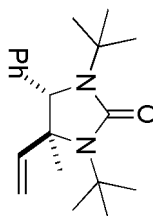

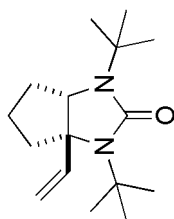

Table 2, entry 5

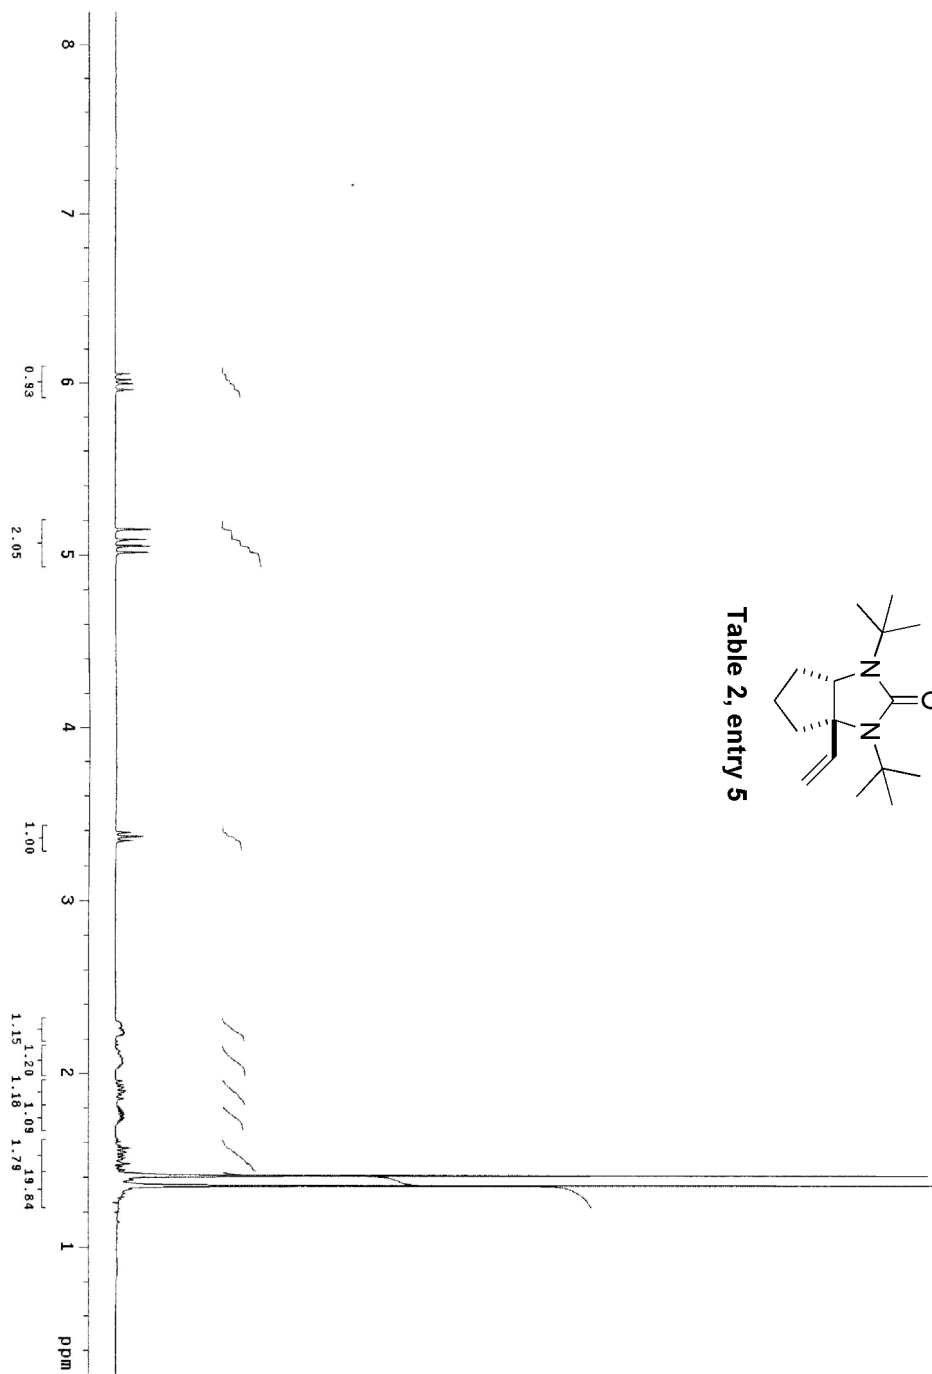

Table 2, entry 5

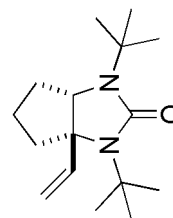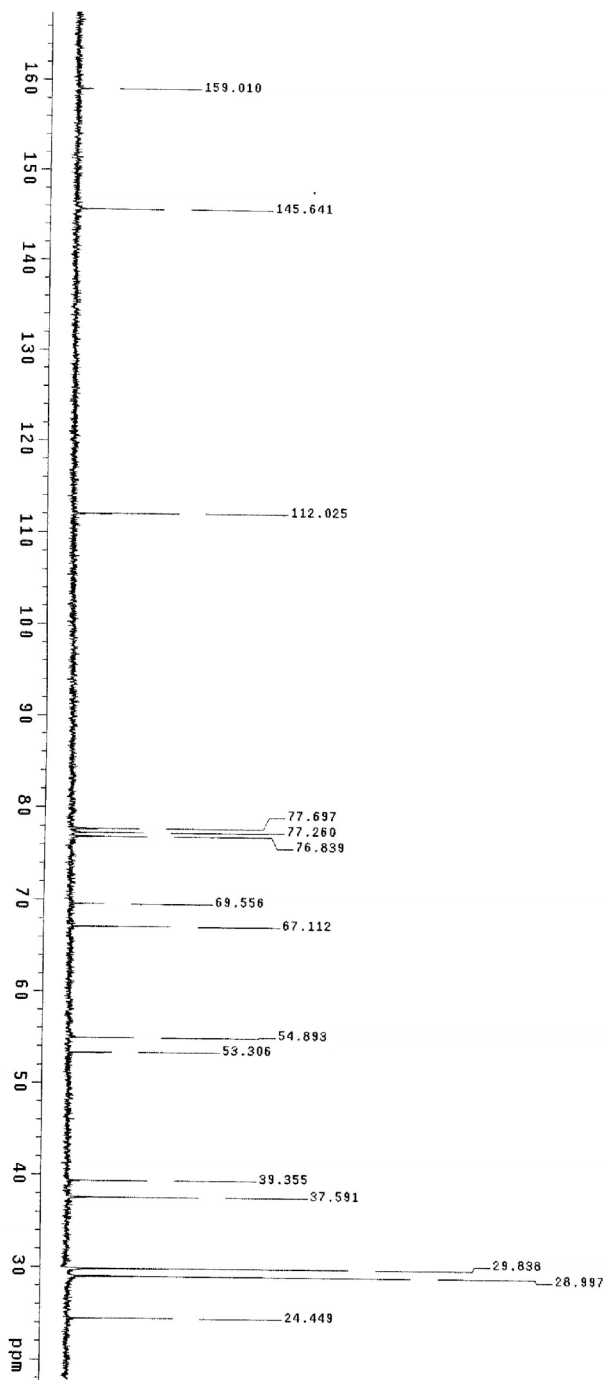



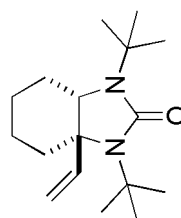

Table 2, entry 6

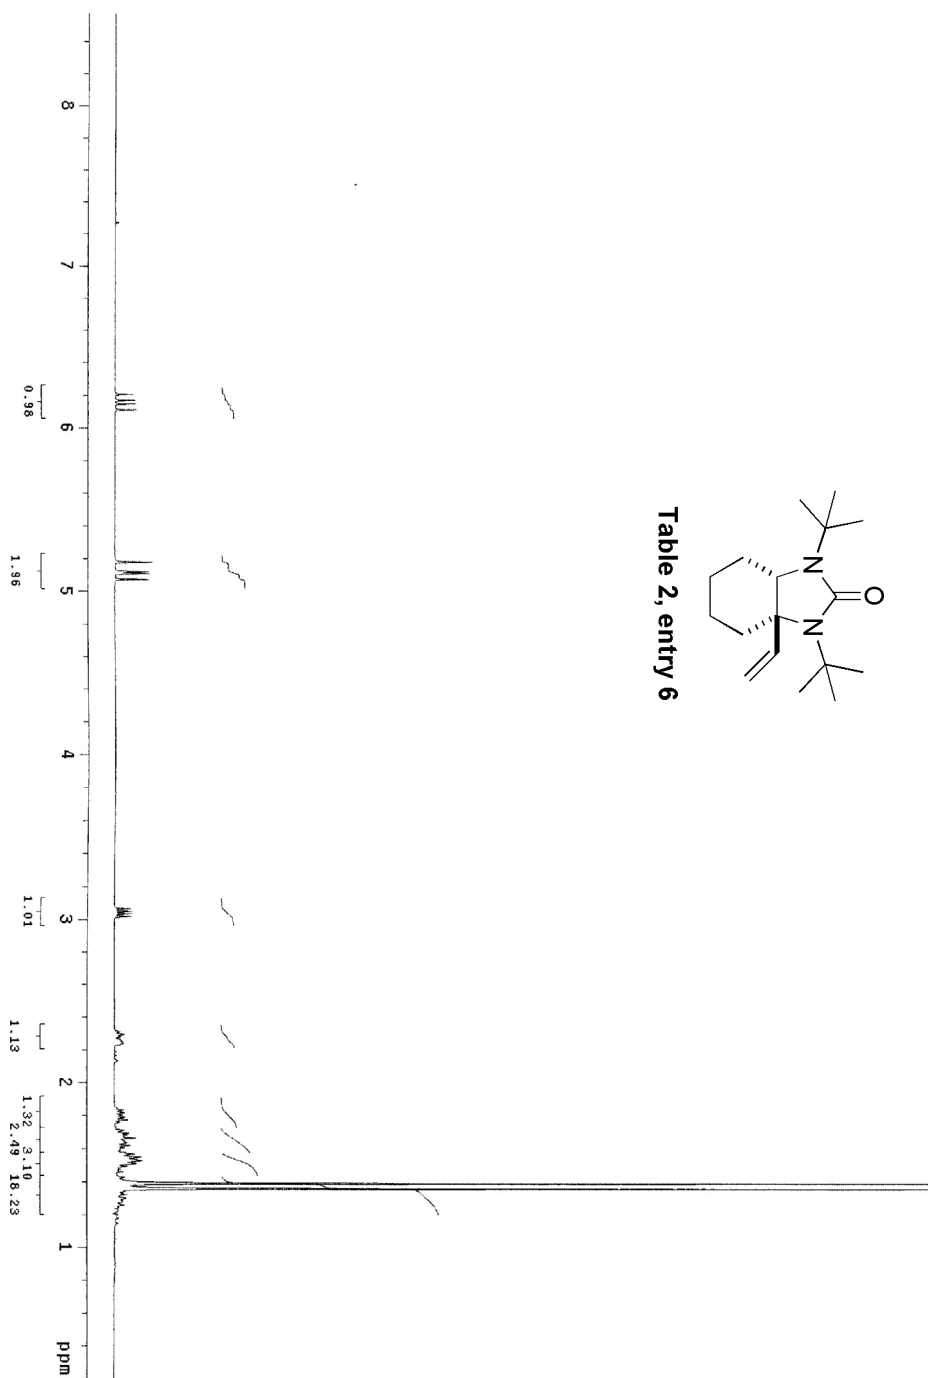

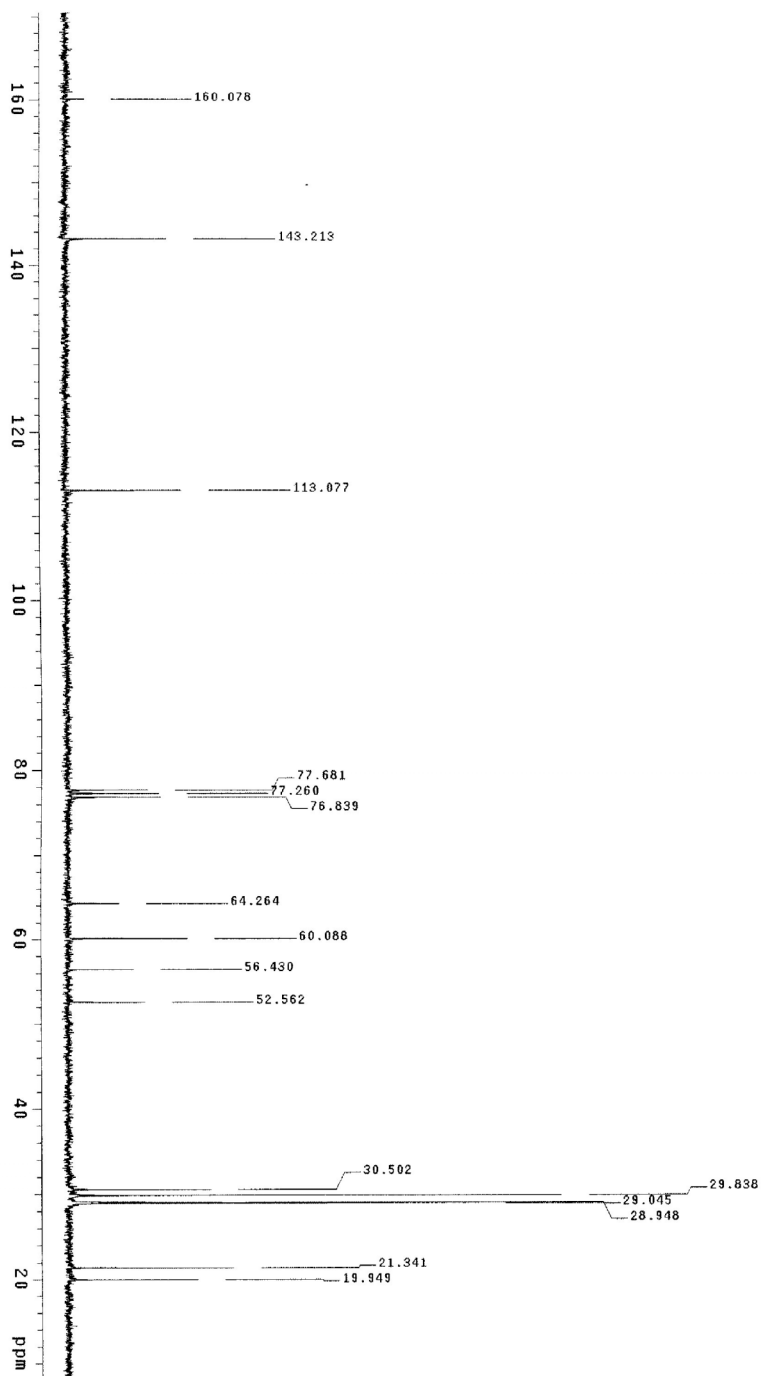

Table 2, entry 6

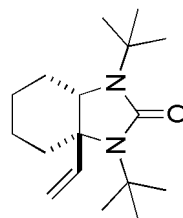

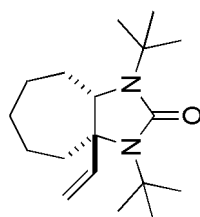

Table 2, entry 7

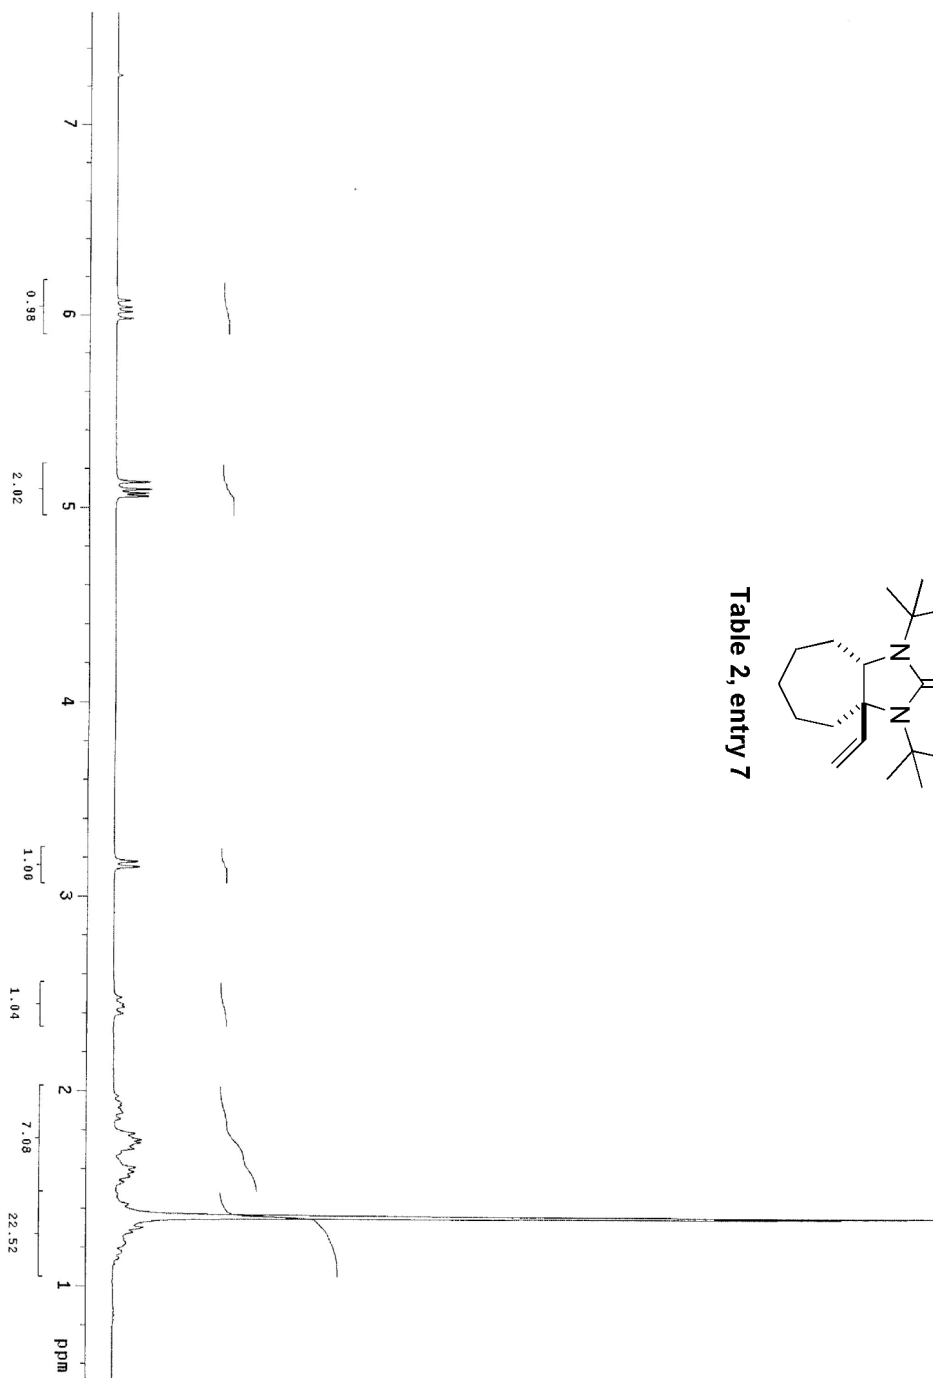

Table 2, entry 7

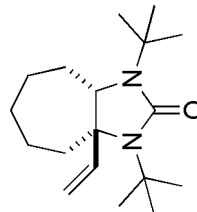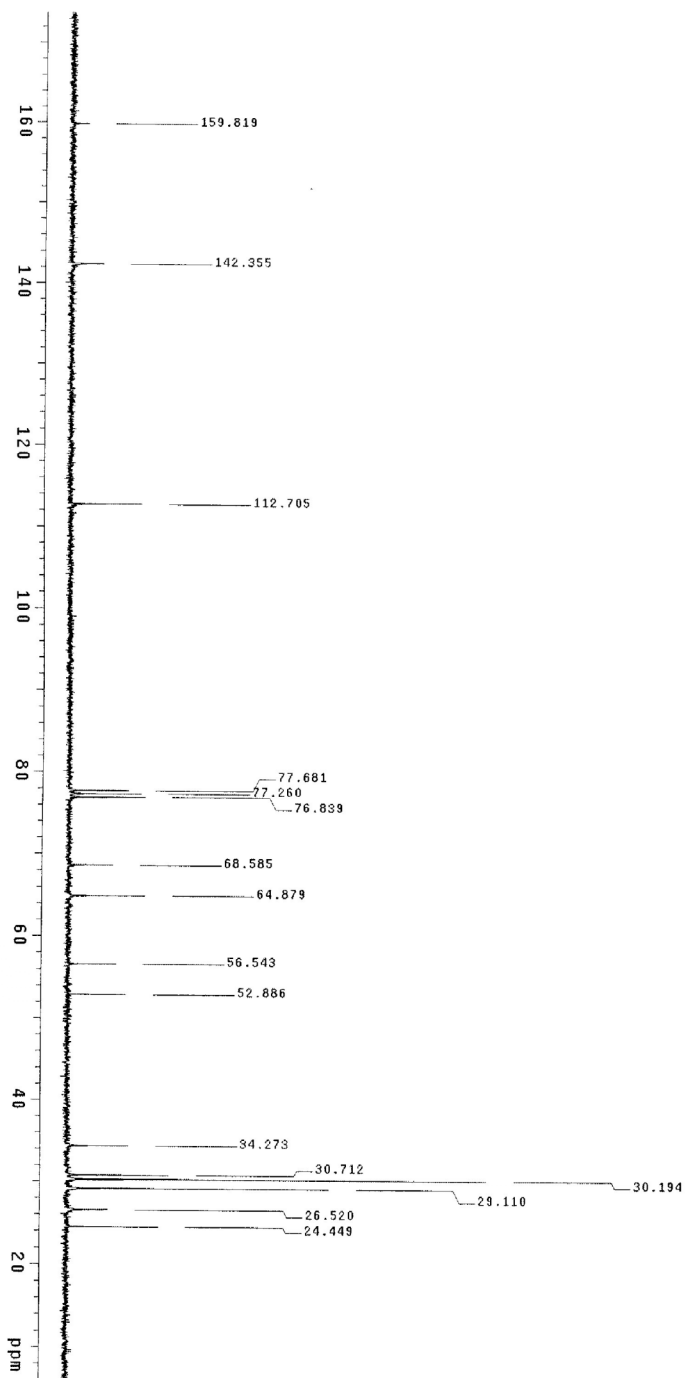

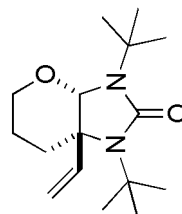

Table 2, entry 8

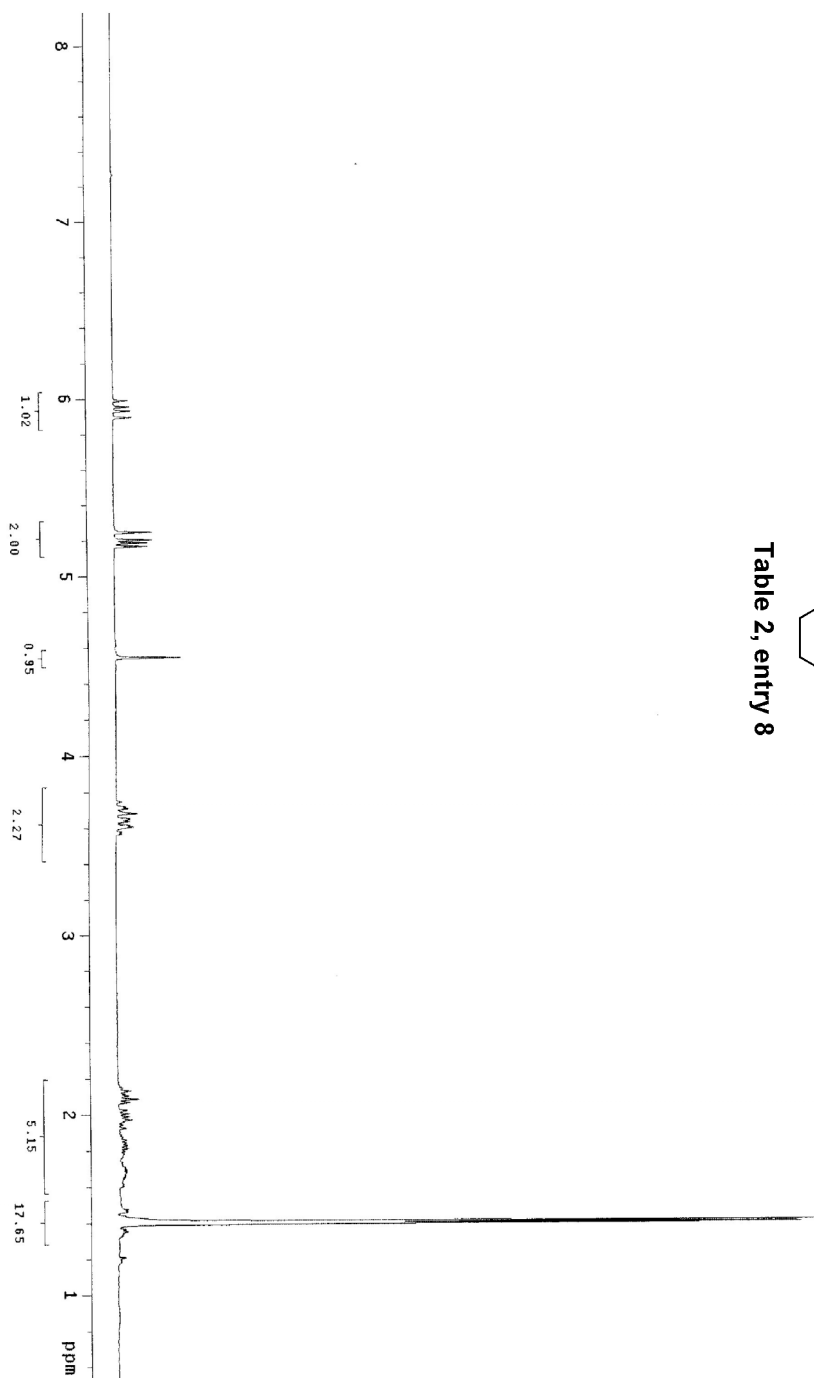

Table 2, entry 8

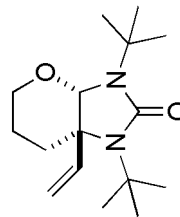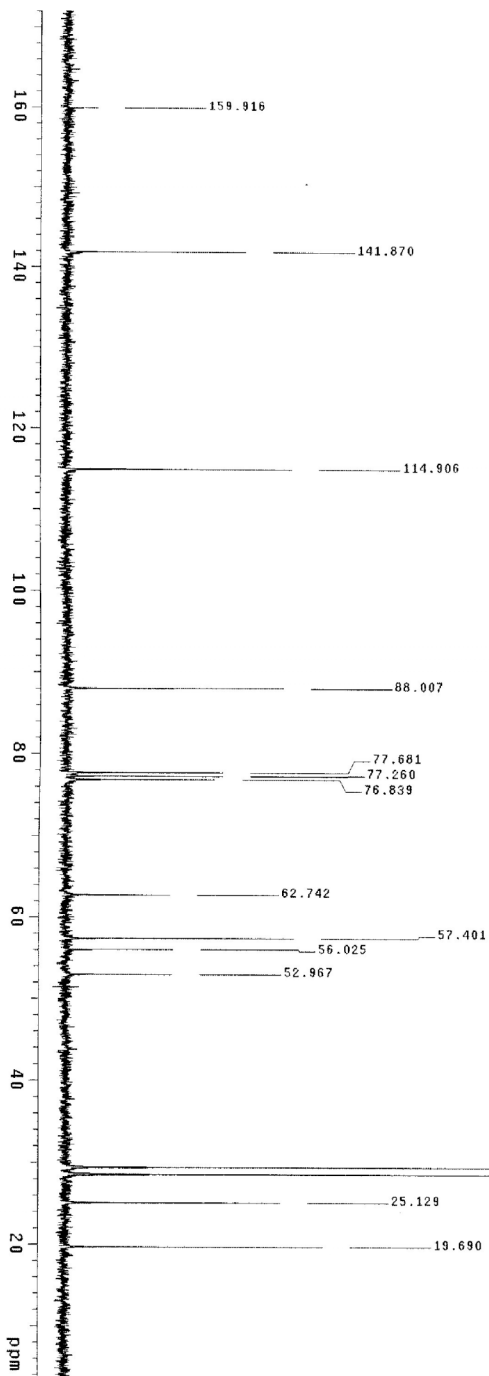

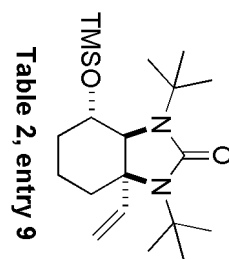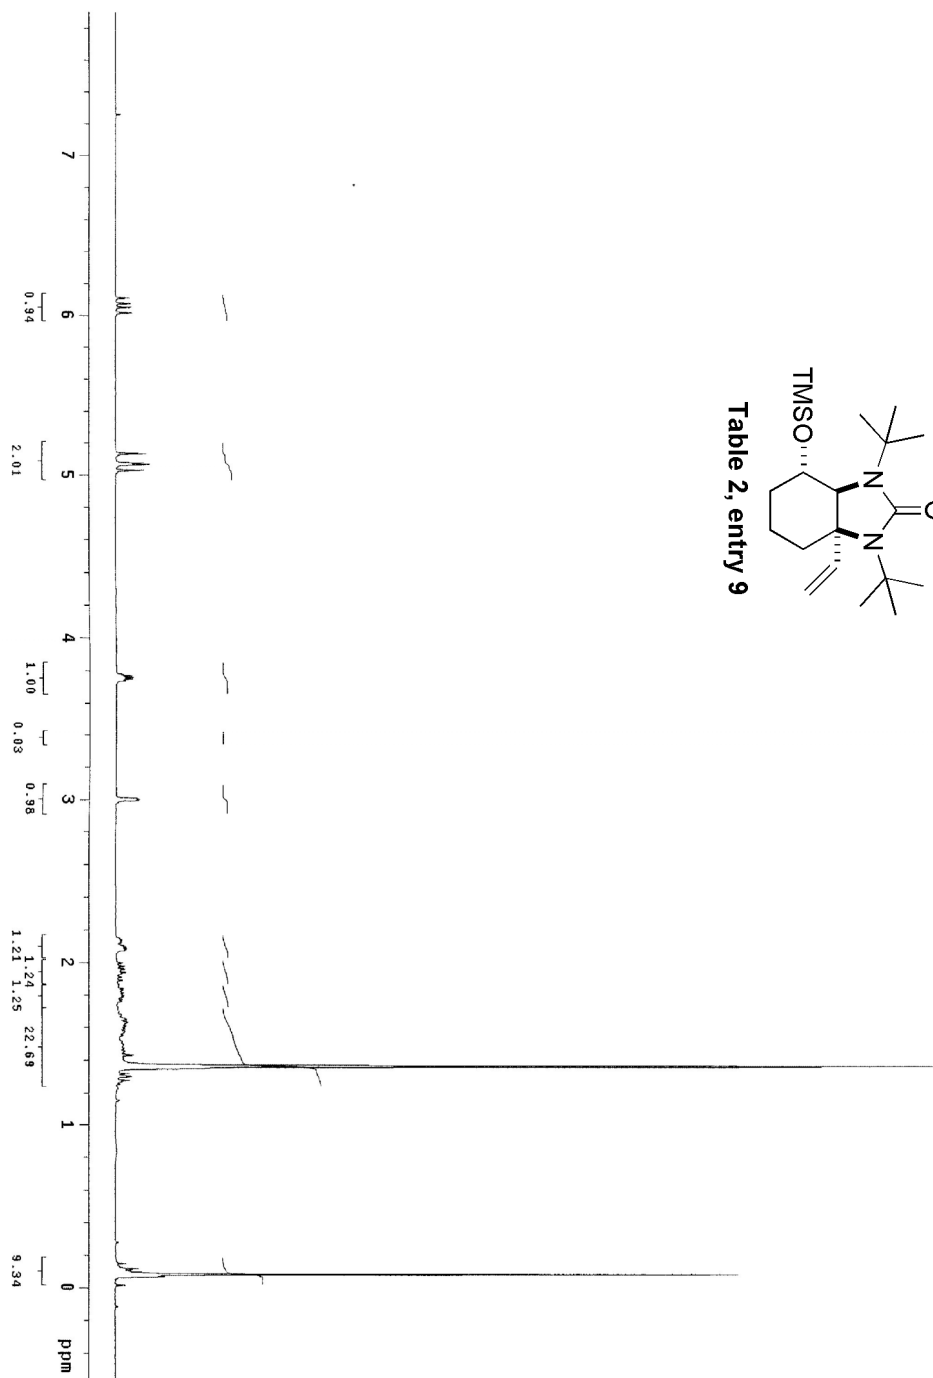

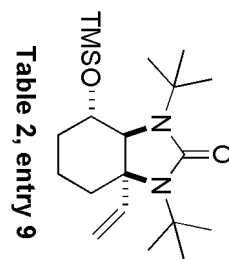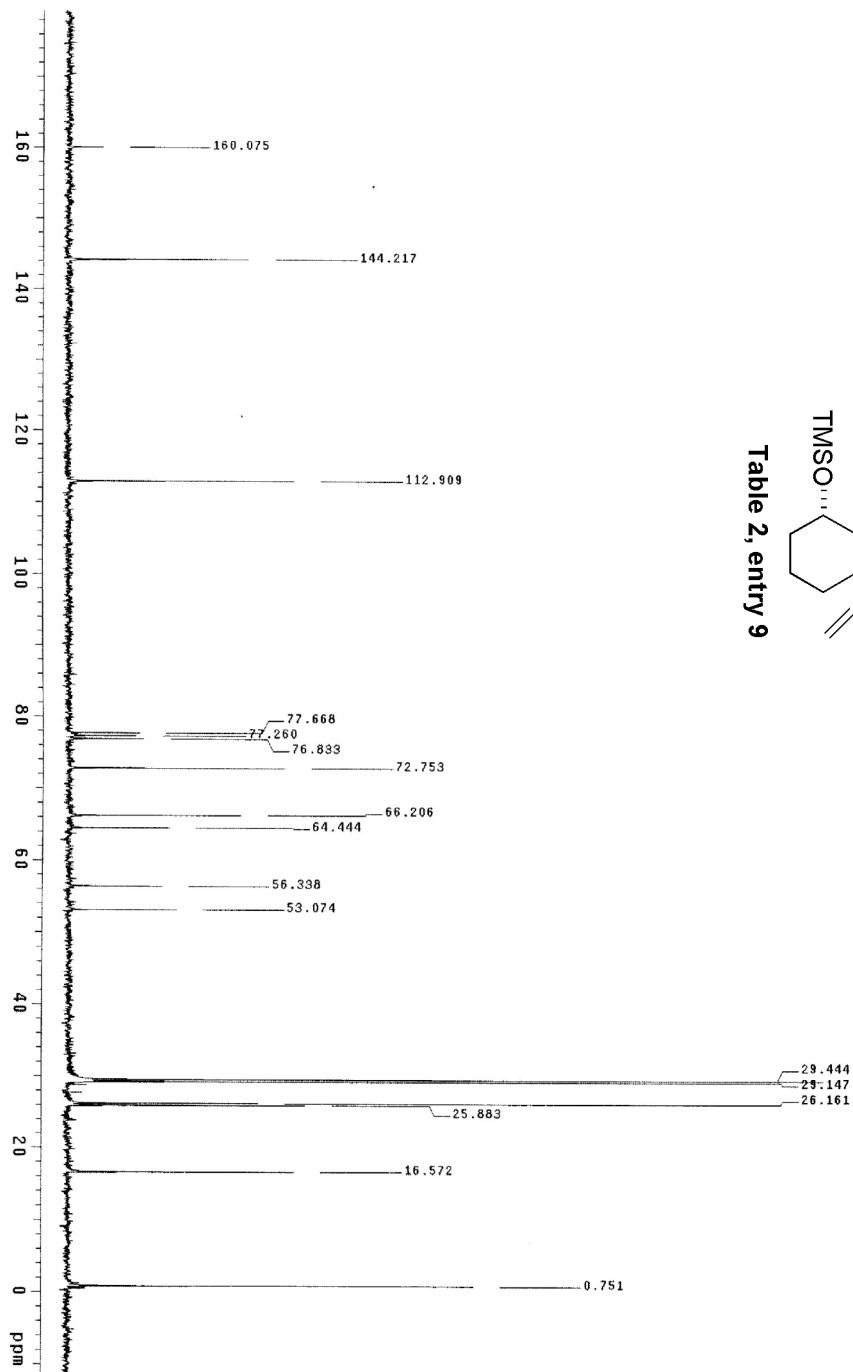



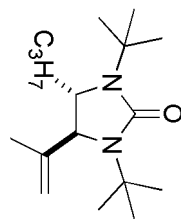

Table 2, entry 10

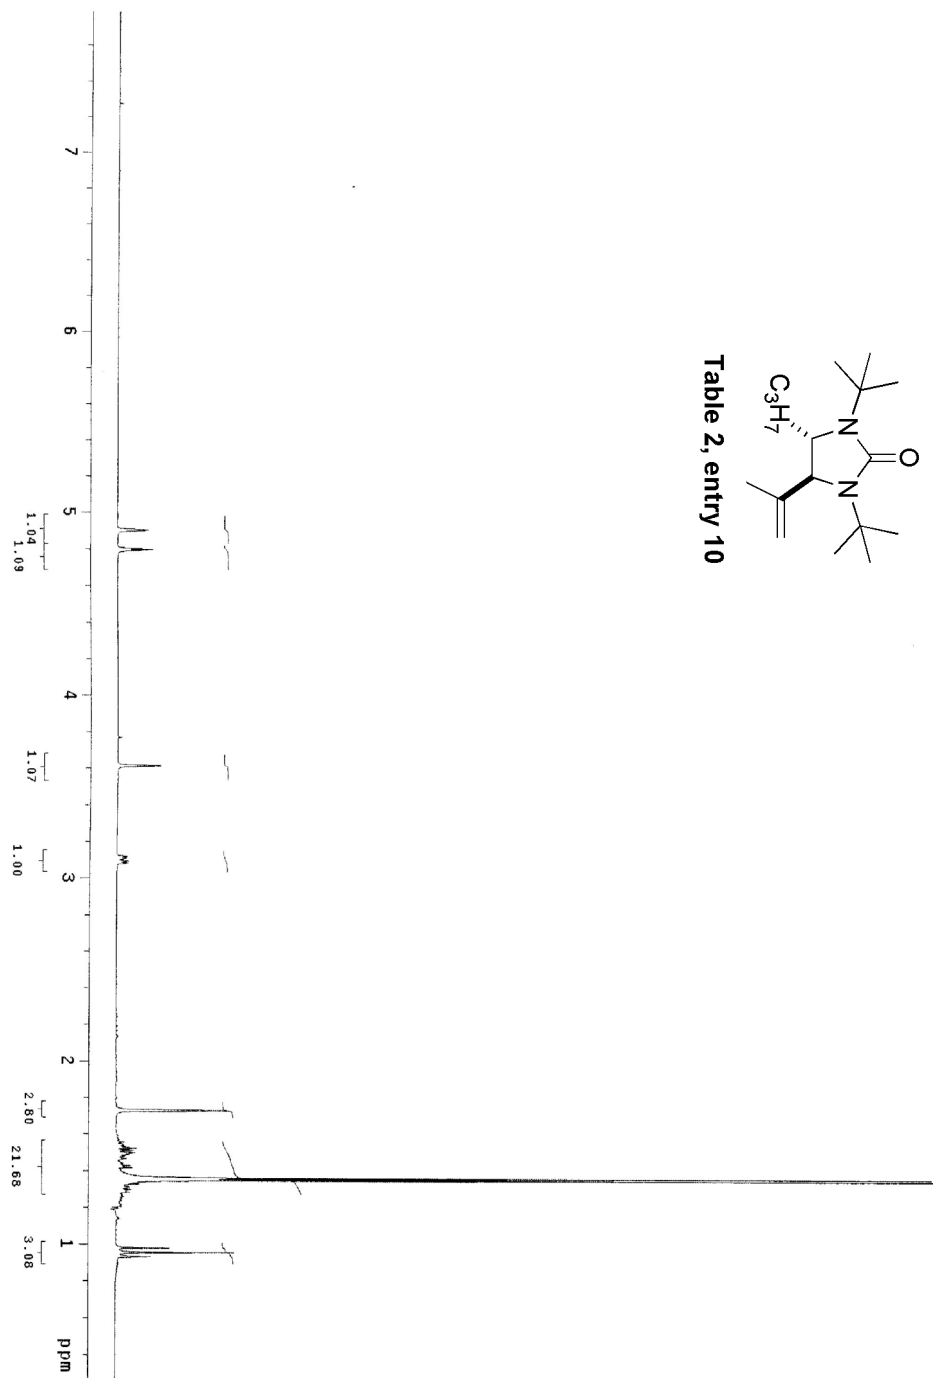

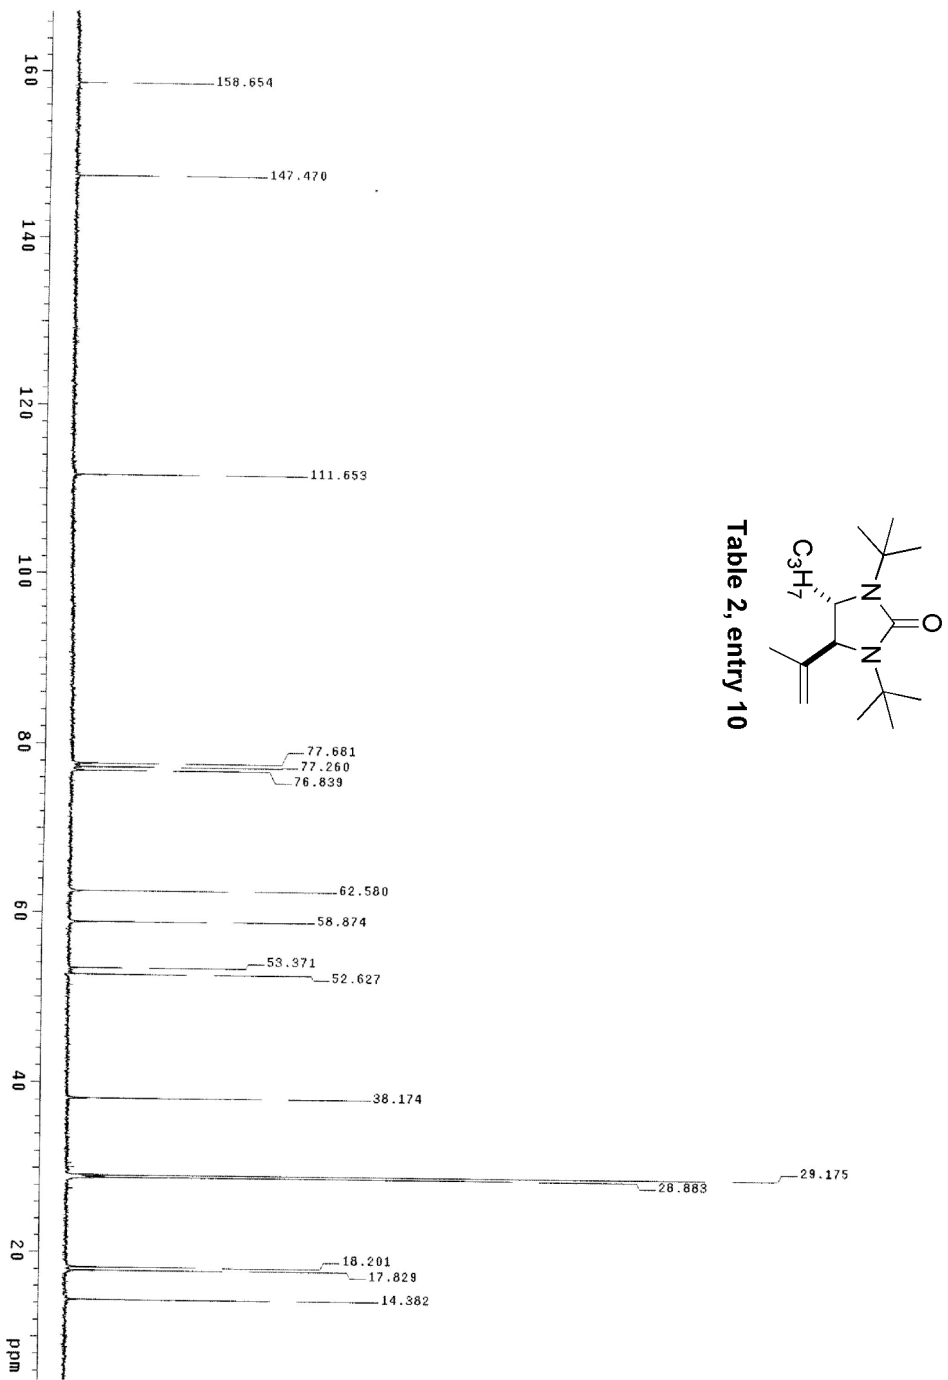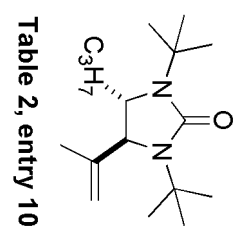

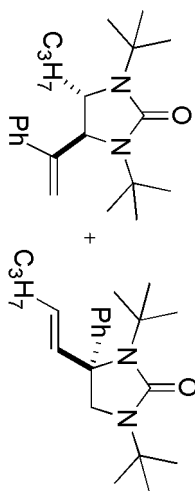

Table 1, entry 11

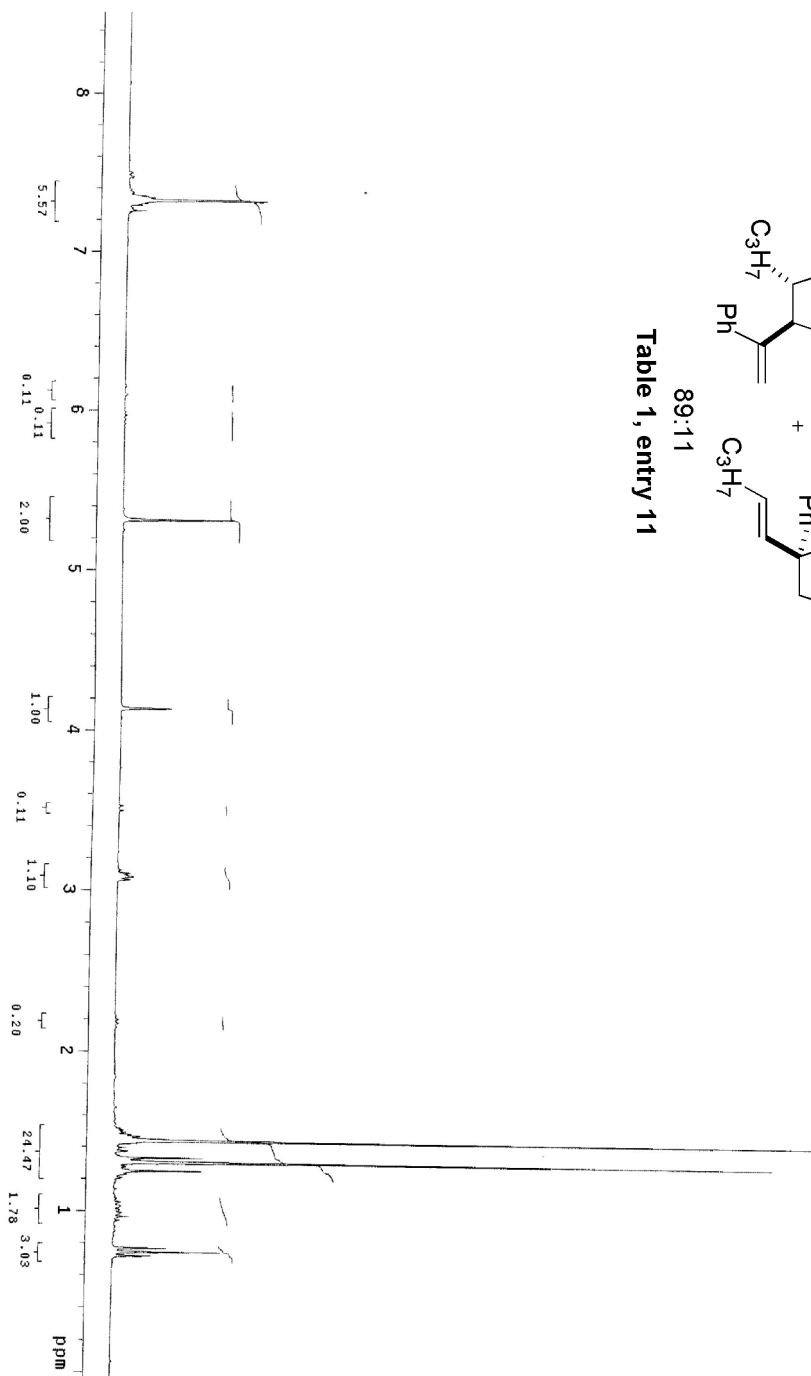

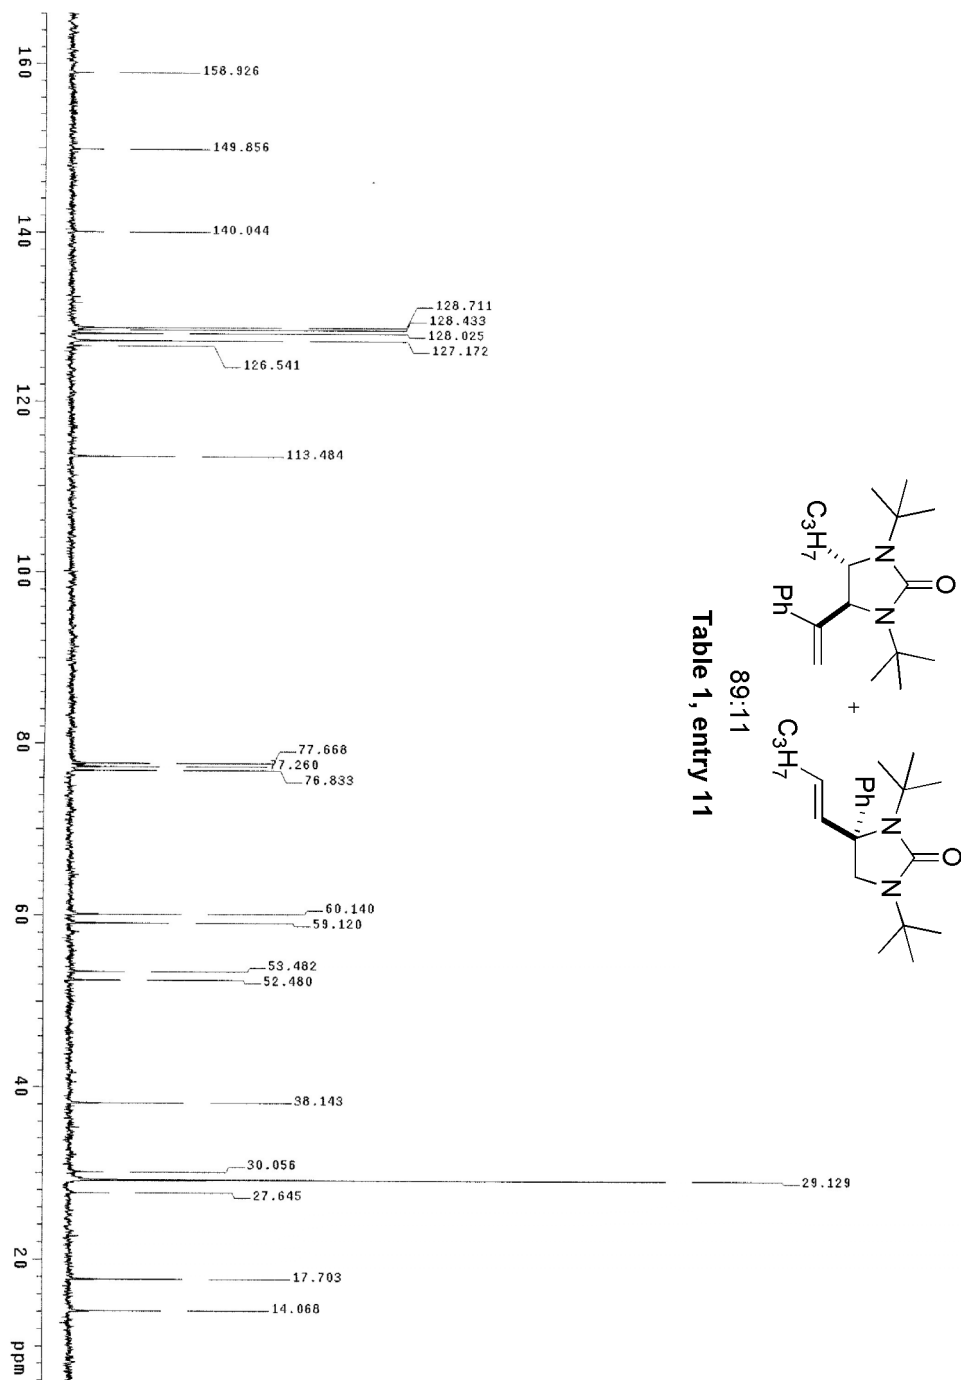

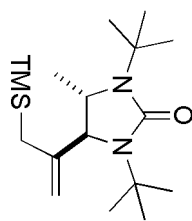

Table 2, entry 12

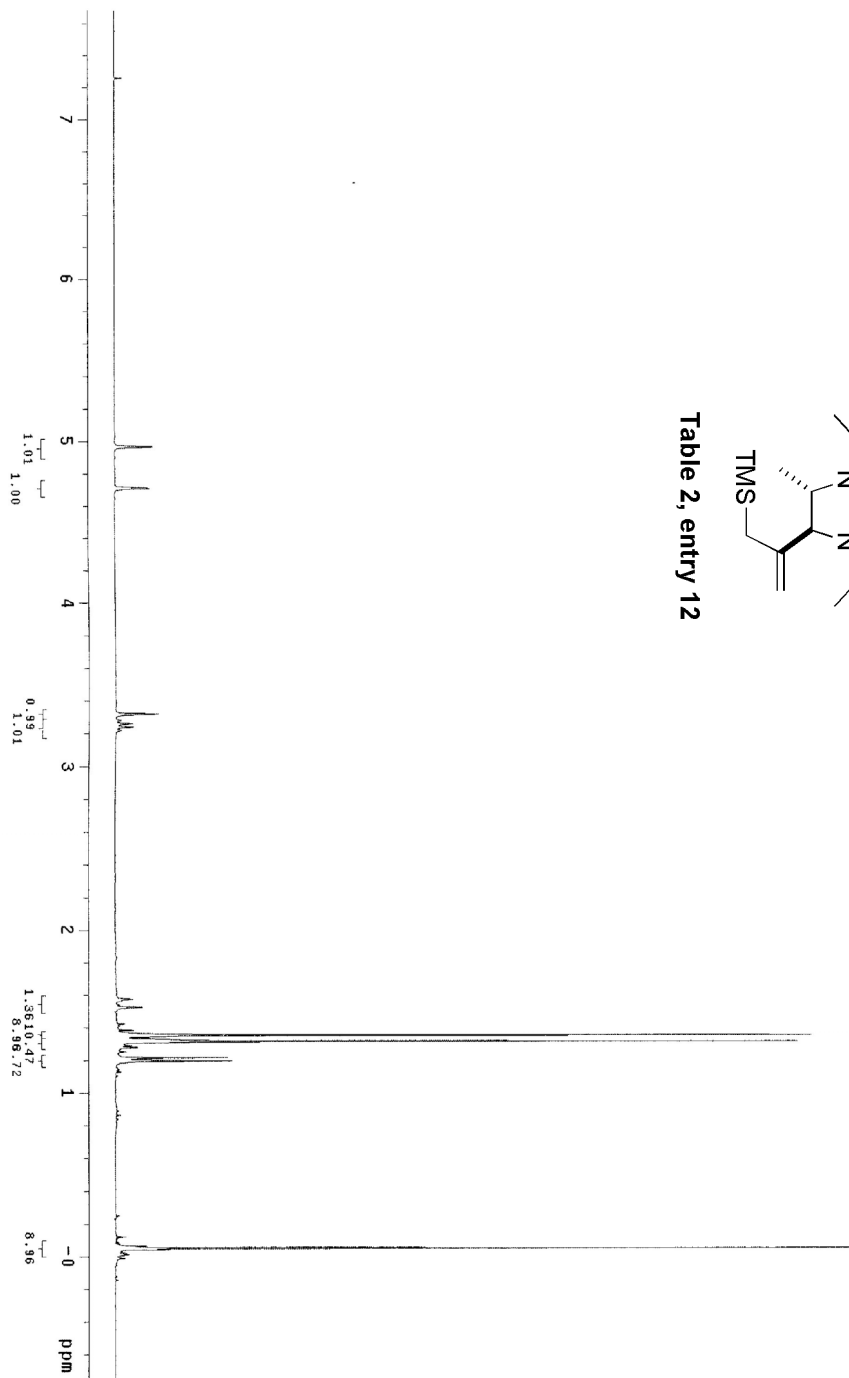

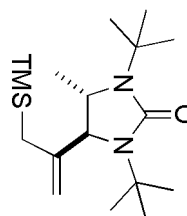

Table 2, entry 12

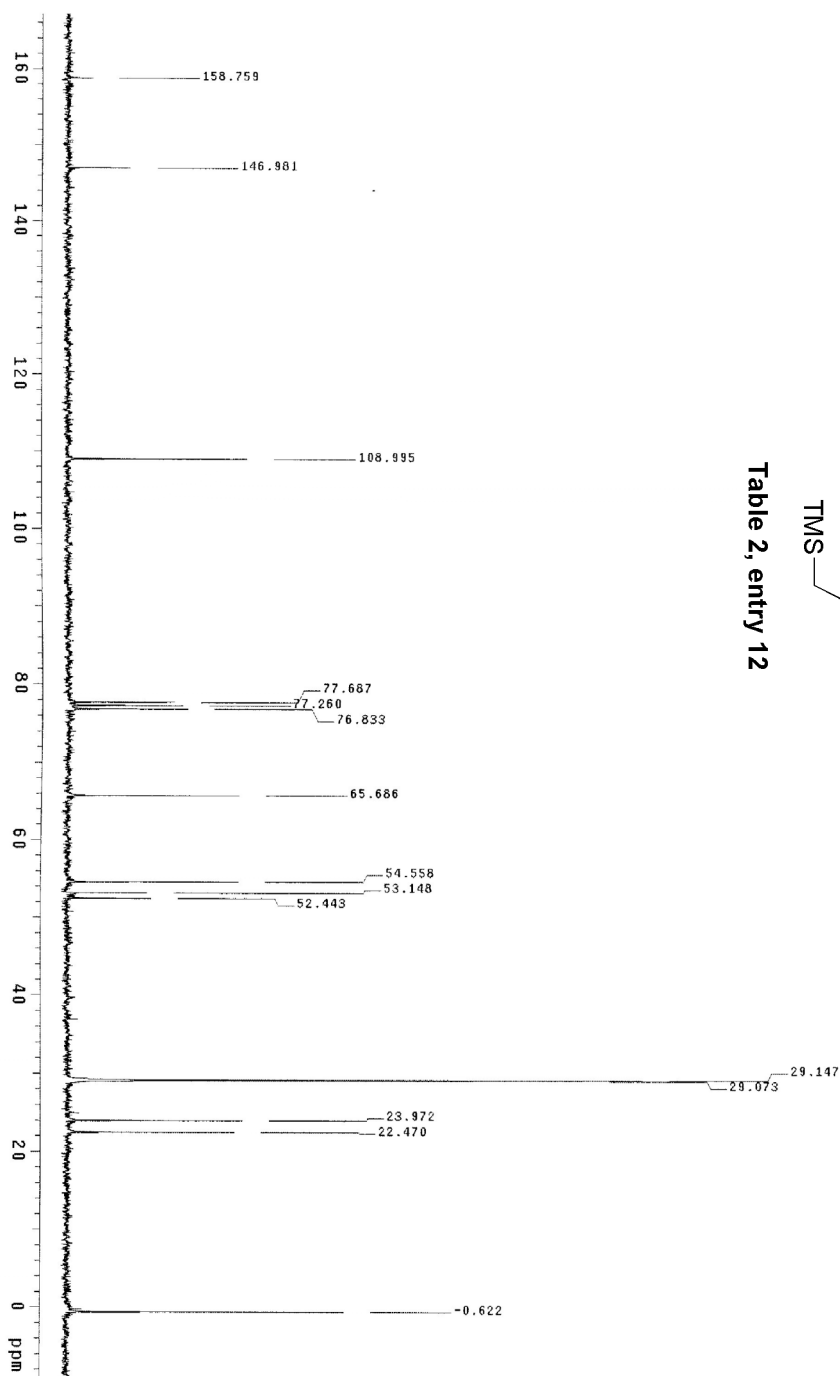

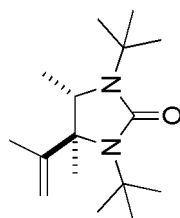

Table 2, entry 13

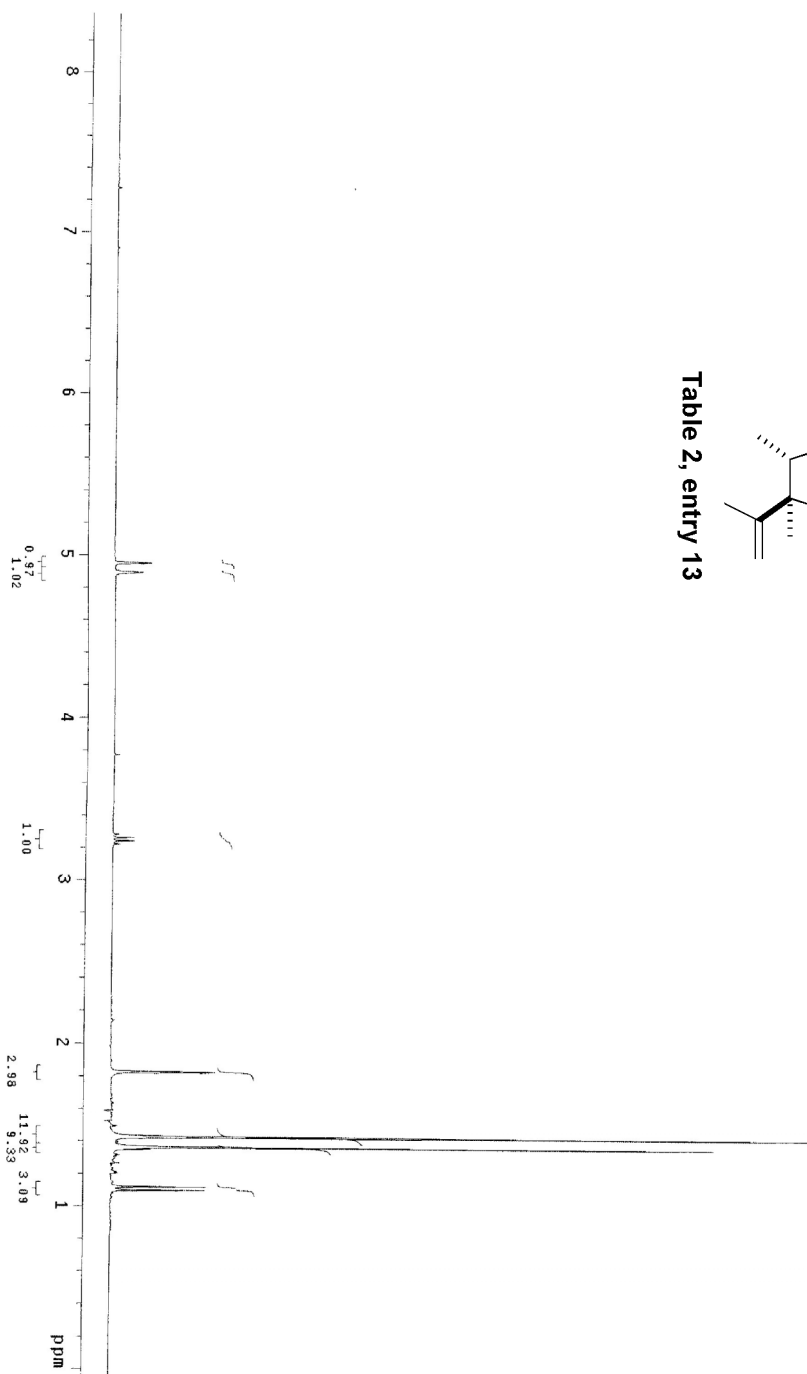

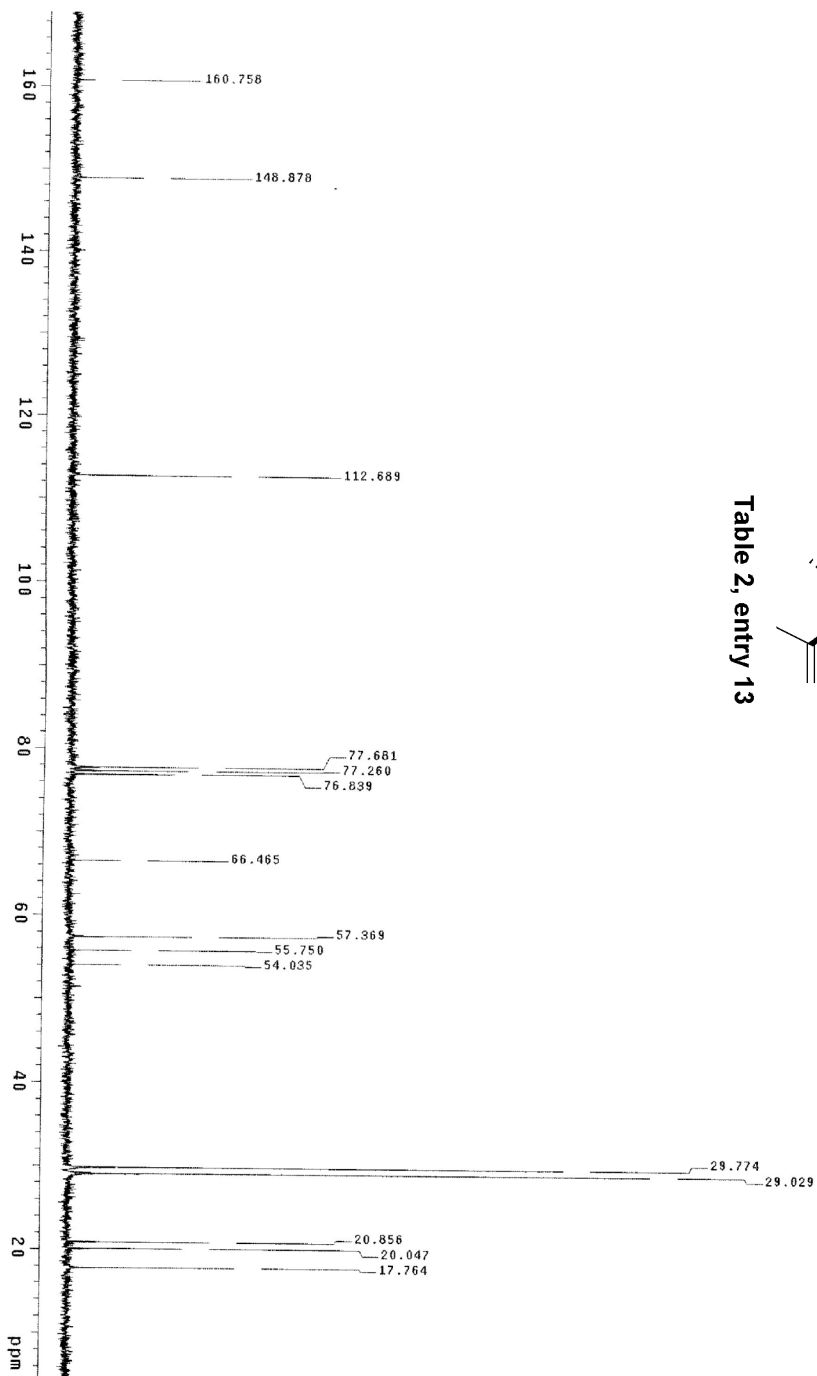

Table 2, entry 13

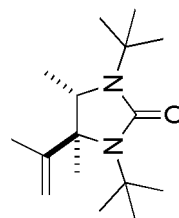



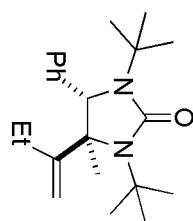

Table 2, entry 14

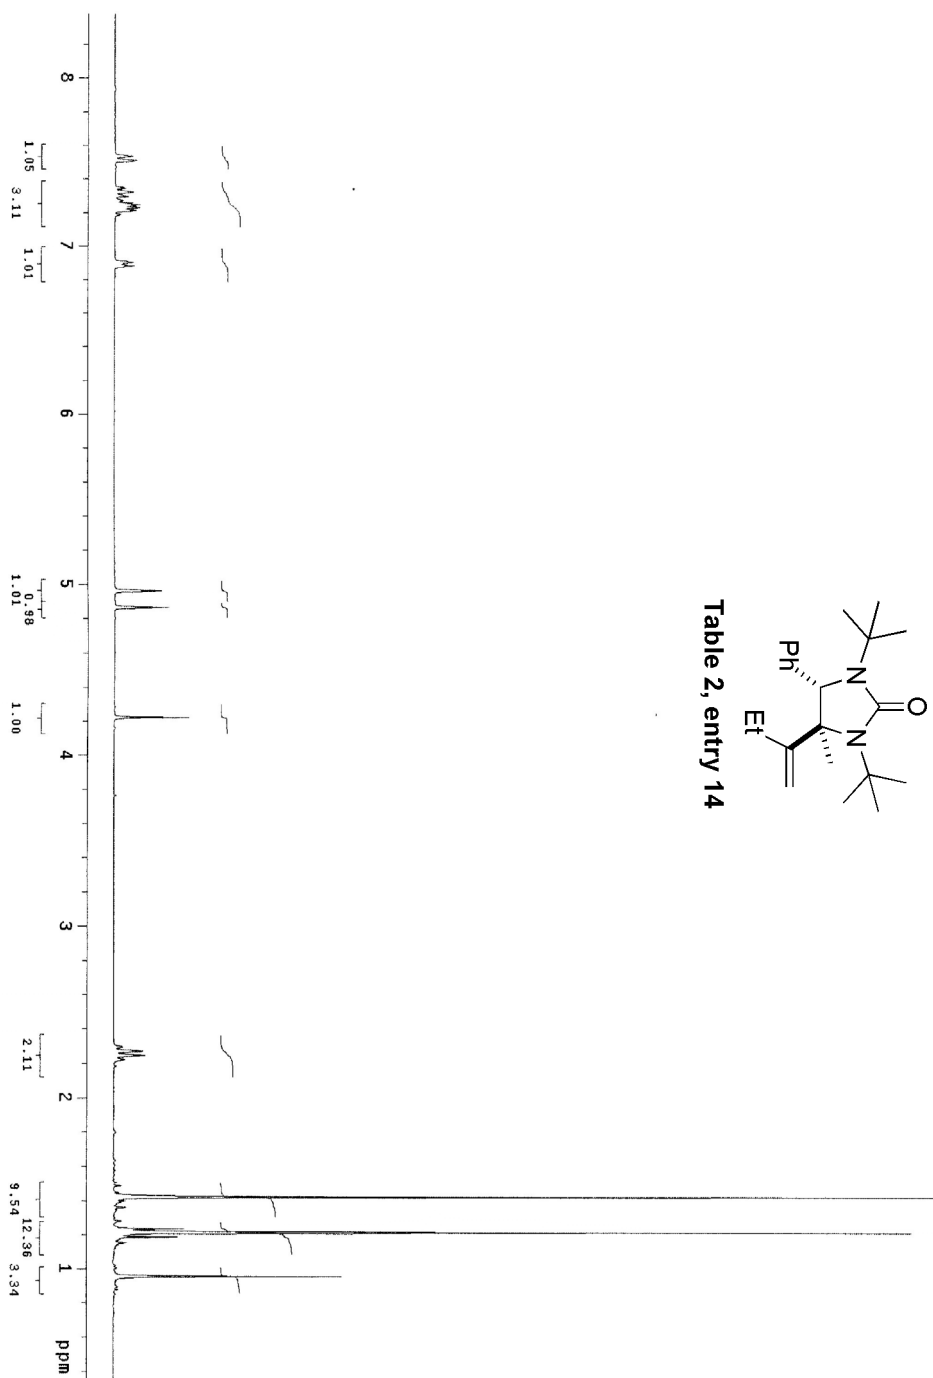

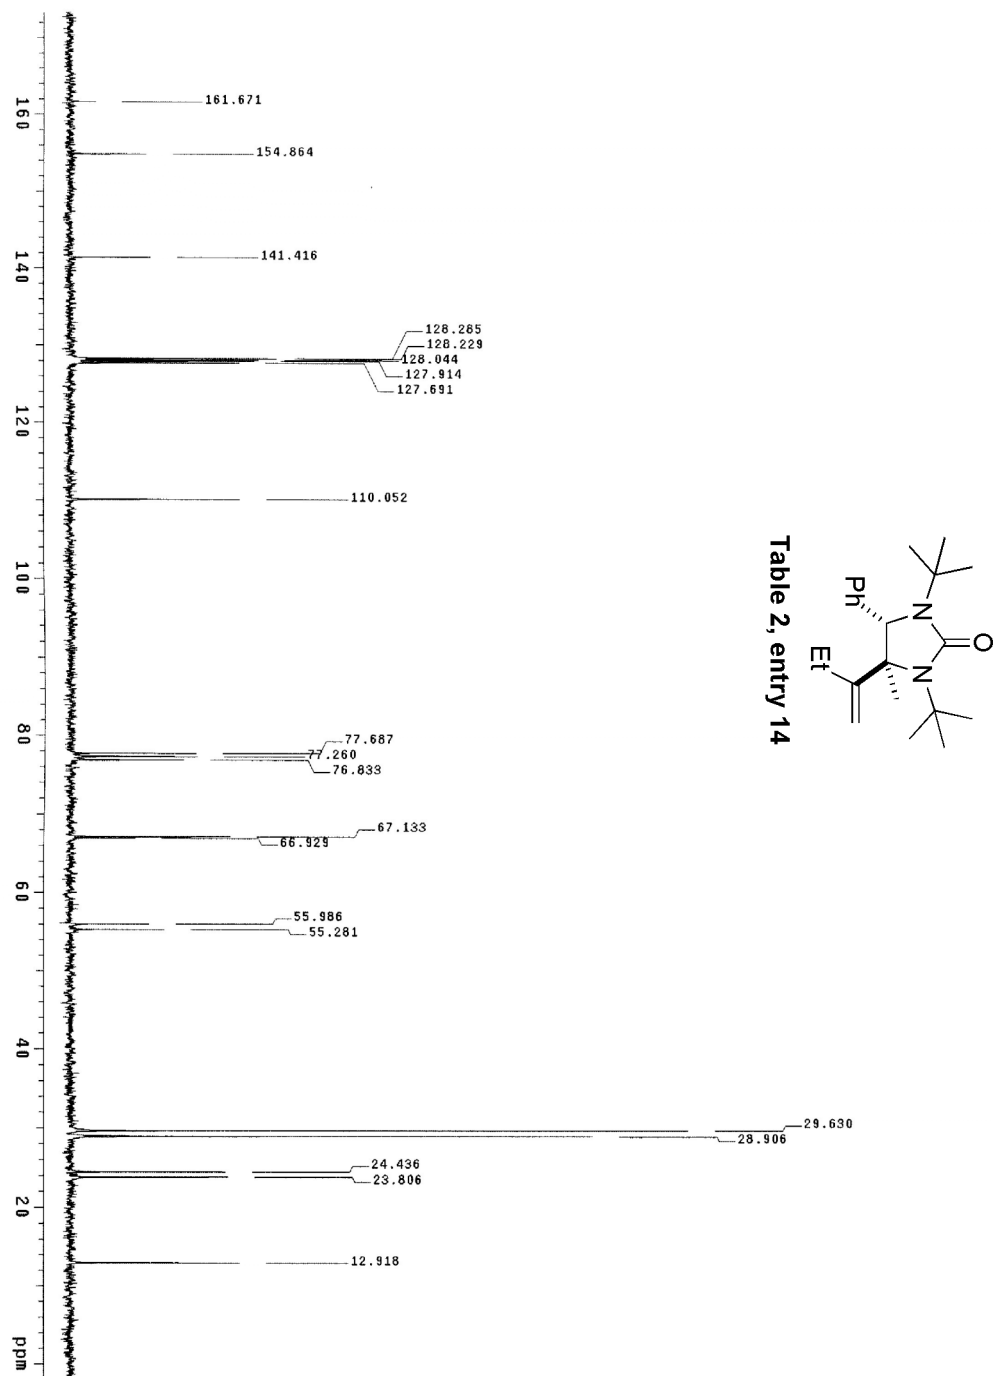

Table 2, entry 14

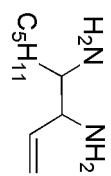

Scheme 2, (±)-5

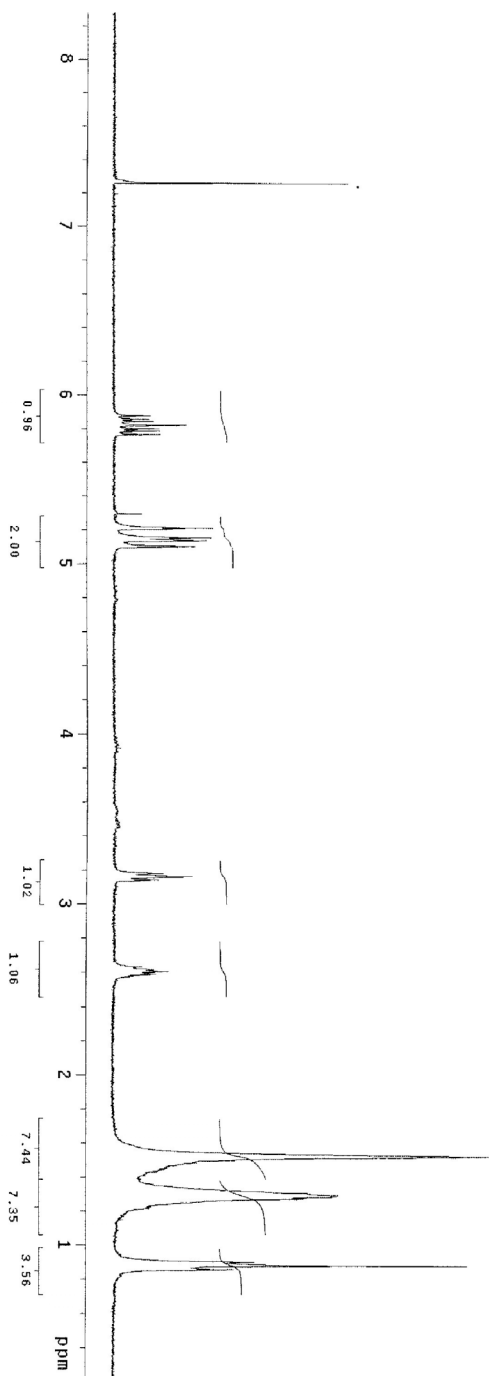

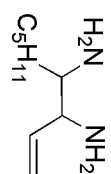

Scheme 2, ( $\pm$ )-5

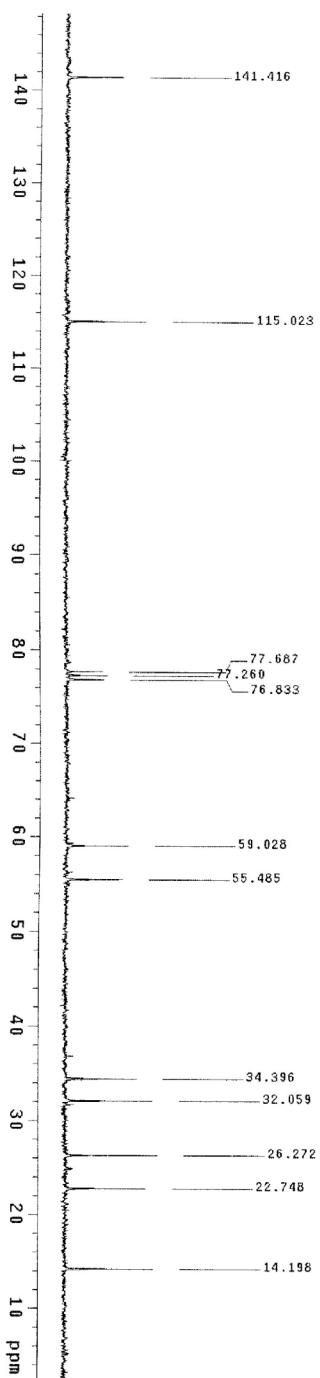

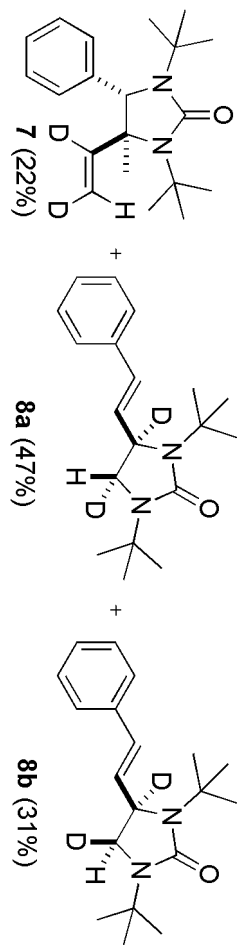

**Scheme 3**

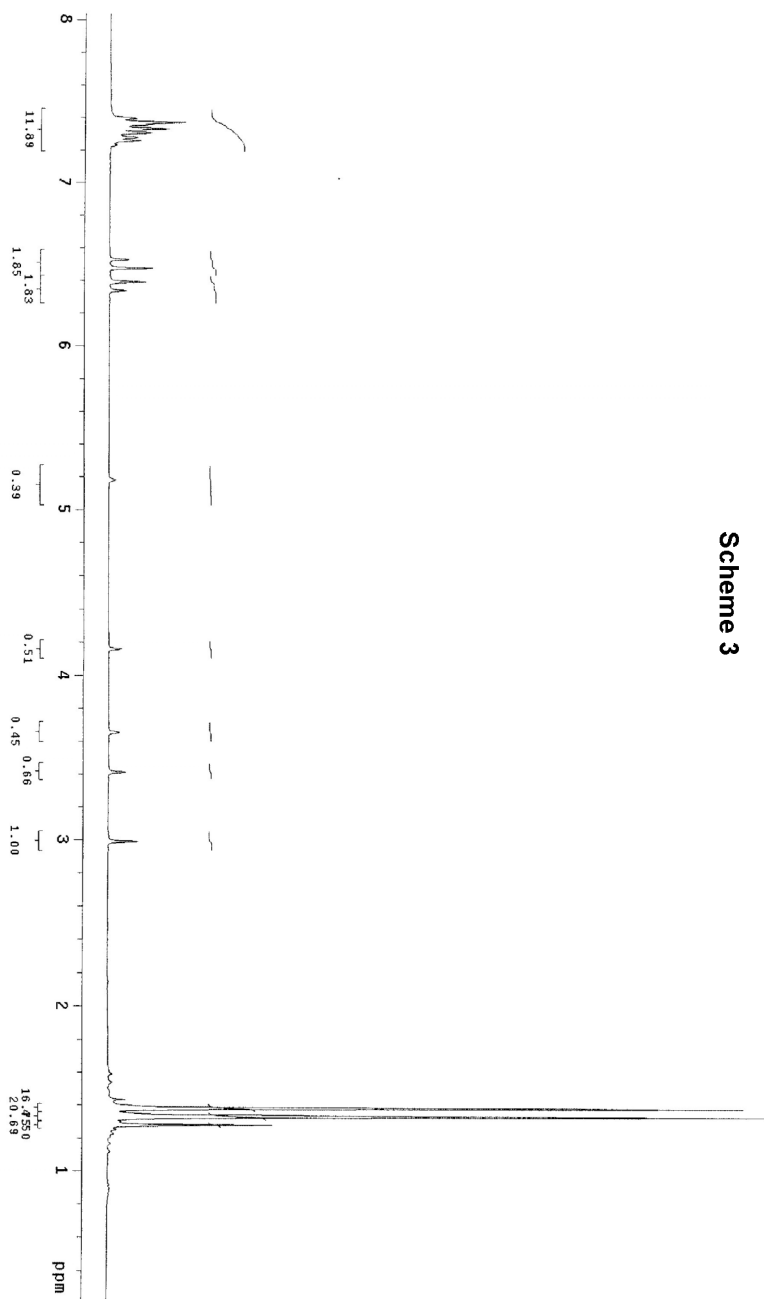

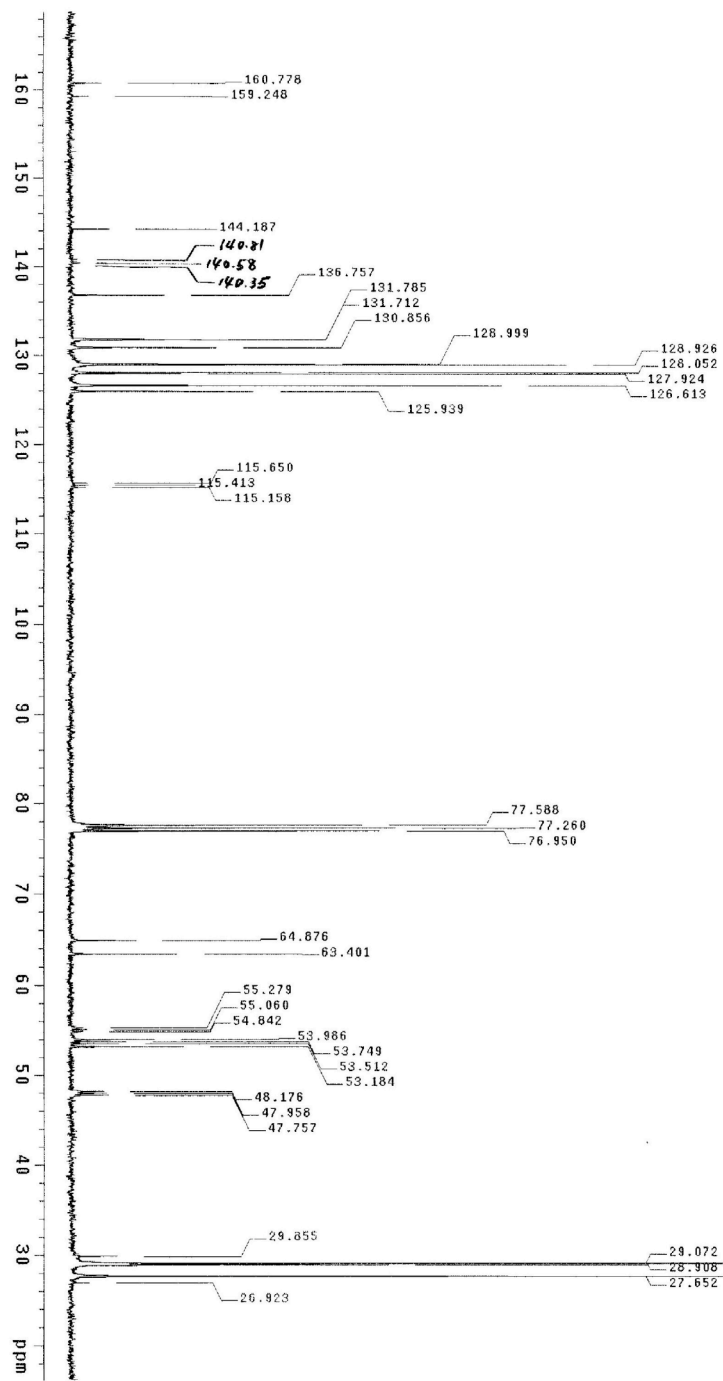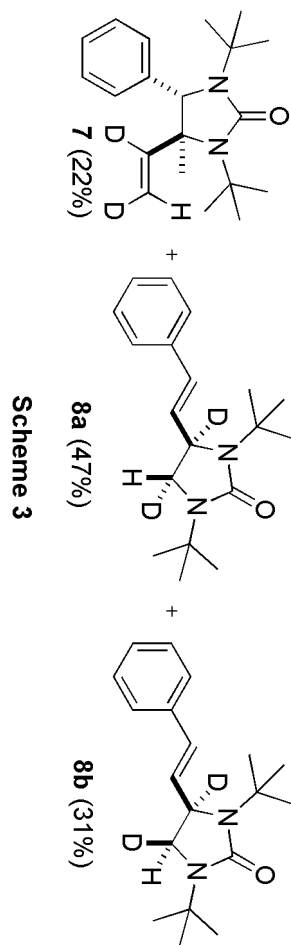

Supplement: NIHMS225139-supplement-1_si_001.pdf [file NIHMS225139-supplement-1_si_001.pdf]
